# Supplementary material for: Are we truly helping those in need: A comprehensive assessment of semen technologies in wild bird species
Source: Biodivers Conserv. 2026 Jun 29;35(8):199. doi: 10.1007/s10531-026-03397-7 (PMC13315471; doi:10.1007/s10531-026-03397-7)
Supplement: Supplementary file 1 — Supplementary Material 1 [file 10531_2026_3397_MOESM1_ESM.xlsx]

## Sheet: dataset Heatmap
Order	Family	Total species	Total threat species (VU, EN, CR, EW)	Threat species per family (%)	Threat studied species	LC species	NT species	VU species	VU studied	EN species	EN studied	CR species	CR studied	EW species	EW studied	Data Deficient	Theat level	Study scale
Eurypygiformes	Rhynochetidae	1	1	100	0	0	0	0	0	1	0	0	0	0	0	0	0.25	0
Mesitornithiformes	Mesitornithidae	3	3	100	0	0	0	3	0	0	0	0	0	0	0	0	0.4	0
Cathartiformes	Cathartidae	7	2	28.5714	0	5	0	1	0	0	0	1	0	0	0	0	0.788571	0
Phoenicopteriformes	Phoenicopteridae	6	1	16.6667	0	2	3	1	0	0	0	0	0	0	0	0	0.725	0
Sphenisciformes	Spheniscidae	21	9	42.8571	3	7	2	4	1	5	2	0	0	0	0	0	0.530952	0.35
Ciconiiformes	Ciconiidae	20	3	15	0	13	4	0	0	3	0	0	0	0	0	o	0.8175	0
Musophagiformes	Musophagidae	24	1	4.16667	0	21	2	0	0	1	0	0	0	0	0	0	0.939583	0
Podicipediformes	Podicipedidae	20	5	25	0	14	1	1	0	3	0	1	0	0	0	0	0.796	0
Otidiformes	Otididae	28	8	28.5714	2	11	7	3	2	2	0	3	0	0	0	0	0.628929	0.111111
Trogoniformes	Trogonidae	43	2	4.65116	0	36	5	0	0	2	0	0	0	0	0	0	0.924419	0
Suliformes	Fregatidae	5	2	40	0	3	0	2	0	0	0	0	0	0	0	0	0.76	0
Suliformes	Phalacrocoracidae	34	11	32.3529	0	21	2	7	0	3	0	1	0	0	0	0	0.763824	0
Suliformes	Sulidae	10	2	20	0	8	0	0	0	2	0	0	0	0	0	0	0.85	0
Struthioniformes	Tinamidae	46	6	13.0435	0	35	5	5	0	1	0	0	0	0	0	0	0.880435	0
Struthioniformes	Struthionidae	2	1	50	0	1	0	1	0	0	0	0	0	0	0	0	0.7	0
Struthioniformes	Apterygidae	5	4	80	0	0	1	4	0	0	0	0	0	0	0	0	0.45	0
Bucerotiformes	Bucerotidae	62	25	40.3226	0	32	5	17	0	5	0	3	0	0	0	0	0.704194	0
Falconiformes	Falconidae	64	8	12.5	1	49	6	6	0	2	1	0	0	0	0	0	0.871875	0.333333
Pelecaniformes	Balaenicipitidae	1	1	100	0	0	0	1	0	0	0	0	0	0	0	0	0.4	0
Pelecaniformes	Threskiornithidae	35	8	22.8571	0	24	3	1	0	4	0	3	0	0	0	0	0.791714	0
Pelecaniformes	Ardeidae	65	9	13.8462	0	53	3	4	0	4	0	1	0	0	0	0	0.887231	0
Cuculiformes	Cuculidae	151	12	7.94702	0	131	8	8	0	2	0	2	0	0	0	0	0.928079	0
Procellariiformes	Diomedeidae	22	15	68.1818	0	1	6	6	0	7	0	2	0	0	0	0	0.422273	0
Procellariiformes	Oceanitidae	10	2	20	0	5	0	0	0	1	0	1	0	0	0	3	0.537	0
Procellariiformes	Procellariidae	96	42	43.75	0	43	11	19	0	10	0	13	0	0	0	0	0.643854	0
Procellariiformes	Hydrobatidae	18	7	38.8889	0	8	3	4	0	2	0	1	0	0	0	0	0.676111	0
Coraciiformes	Brachypteraciidae	5	3	60	0	1	1	3	0	0	0	0	0	0	0	0	0.57	0
Coraciiformes	Alcedinidae	119	13	10.9244	0	81	24	8	0	0	0	4	0	1	0	1	0.842857	0
Coraciiformes	Momotidae	14	1	7.14286	0	13	0	1	0	0	0	0	0	0	0	0	0.957143	0
Gruiformes	Gruidae	23	10	43.4783	8	4	1	7	6	2	1	1	1	0	0	0	0.35087	0.809524
Gruiformes	Psophiidae	6	3	50	0	3	0	1	0	1	0	1	0	0	0	0	0.628333	0
Gruiformes	Heliornithidae	3	1	33.3333	0	2	0	0	0	0	0	1	0	0	0	0	0.706667	0
Gruiformes	Rallidae	144	34	23.6111	0	99	9	20	0	8	0	6	0	0	0	2	0.802569	0
Anseriformes	Anatidae	167	26	15.5689	1	126	14	12	0	8	1	6	0	0	0	0	0.854012	0.0416667
Strigiformes	Strigidae	223	36	16.1435	0	163	23	21	0	10	0	5	0	0	0	1	0.849552	0
Strigiformes	Tytonidae	15	4	26.6667	0	11	0	3	0	1	0	0	0	0	0	0	0.83	0
Accipitriformes	Accipitridae	247	56	22.6721	4	158	28	23	3	20	0	13	1	0	0	1	0.777166	0.0602007
Accipitriformes	Sagittariidae	1	1	100	0	0	0	0	0	1	0	0	0	0	0	0	0.25	0
Accipitriformes	Elanidae	6	1	16.6667	0	4	1	1	0	0	0	0	0	0	0	0	0.841667	0
Galliformes	Phasianidae	195	38	19.4872	7	121	28	22	6	11	1	5	0	0	0	1	0.776154	0.0757576
Galliformes	Cracidae	57	22	38.5965	1	28	6	10	0	6	1	5	0	1	0	0	0.667018	0.0333333
Galliformes	Numididae	8	1	12.5	0	7	0	1	0	0	0	0	0	0	0	0	0.925	0
Galliformes	Megapodiidae	21	9	42.8571	0	10	2	7	0	1	0	1	0	0	0	0	0.689048	0
Galliformes	Odontophoridae	35	4	11.4286	0	26	5	4	0	0	0	0	0	0	0	0	0.881429	0
Columbiformes	Columbidae	353	65	18.4136	0	241	46	33	0	18	0	13	0	1	0	1	0.82204	0
Psittaciformes	Cacatuidae	28	10	35.7143	6	10	2	4	3	2	1	4	2	0	0	0	0.495714	0.541667
Psittaciformes	Psittacidae	404	96	23.7624	24	233	51	50	14	26	7	19	2	1	1	0	0.730074	0.513425
Psittaciformes	Strigopidae	4	3	75	1	0	0	1	0	1	1	1	0	0	0	0	0.1925	0.333333
Charadriiformes	Laridae	102	14	13.7255	1	79	8	9	1	4	0	1	0	0	0	0	0.871765	0.0185185
Charadriiformes	Pedionomidae	1	1	100	0	0	0	0	0	1	0	0	0	0	0	0	0.25	0
Charadriiformes	Pluvianellidae	1	1	100	0	0	0	1	0	0	0	0	0	0	0	0	0.4	0
Charadriiformes	Rostratulidae	3	1	33.3333	0	2	0	0	0	1	0	0	0	0	0	0	0.75	0
Charadriiformes	Turnicidae	18	4	22.2222	0	13	0	2	0	0	0	2	0	0	0	1	0.78	0
Charadriiformes	Alcidae	24	6	25	0	15	3	4	0	2	0	0	0	0	0	0	0.79375	0
Charadriiformes	Recurvirostridae	7	1	14.2857	0	6	0	0	0	0	0	1	0	0	0	0	0.874286	0
Charadriiformes	Scolopacidae	92	13	14.1304	0	60	19	6	0	4	0	3	0	0	0	0	0.827283	0
Charadriiformes	Charadriidae	72	9	12.5	0	55	8	4	0	2	0	3	0	0	0	0	0.870278	0
Charadriiformes	Jacanidae	8	1	12.5	0	7	0	0	0	1	0	0	0	0	0	0	0.90625	0
Charadriiformes	Haematopodidae	10	1	10	0	8	1	0	0	1	0	0	0	0	0	0	0.89	0
Charadriiformes	Glareolidae	17	1	5.88235	0	14	2	0	0	0	0	1	0	0	0	0	0.907059	0
Piciformes	Lybiidae	53	3	5.66038	0	48	1	2	0	1	0	0	0	0	0	1	0.937736	0
Piciformes	Capitonidae	18	1	5.55556	0	13	4	1	0	0	0	0	0	0	0	0	0.888889	0
Piciformes	Picidae	252	15	5.95238	0	215	22	9	0	3	0	3	0	0	0	0	0.928611	0
Piciformes	Bucconidae	38	1	2.63158	0	36	1	0	0	1	0	0	0	0	0	0	0.971053	0
Caprimulgiformes	Aegothelidae	10	1	10	0	8	1	0	0	0	0	1	0	0	0	0	0.877	0
Caprimulgiformes	Apodidae	97	7	7.21649	0	82	3	7	0	0	0	0	0	0	0	5	0.89433	0
Caprimulgiformes	Caprimulgidae	97	9	9.27835	0	83	4	6	0	1	0	2	0	0	0	1	0.912268	0
Caprimulgiformes	Trochilidae	371	33	8.89488	0	317	20	13	0	12	0	8	0	0	0	1	0.914178	0
Caprimulgiformes	Podargidae	14	1	7.14286	0	11	2	1	0	0	0	0	0	0	0	0	0.907143	0
Passeriformes	Acanthisittidae	2	1	50	0	1	0	0	0	1	0	0	0	0	0	0	0.625	0
Passeriformes	Acanthizidae	64	5	7.8125	0	57	2	4	0	1	0	0	0	0	0	0	0.939844	0
Passeriformes	Acrocephalidae	54	16	29.6296	0	34	4	7	0	5	0	4	0	0	0	0	0.761667	0
Passeriformes	Alaudidae	92	7	7.6087	0	82	1	2	0	3	0	2	0	0	0	2	0.917826	0
Passeriformes	Atrichornithidae	2	2	100	0	0	0	0	0	2	0	0	0	0	0	0	0.25	0
Passeriformes	Bernieridae	11	1	9.09091	0	7	2	1	0	0	0	0	0	0	0	1	0.790909	0
Passeriformes	Calcariidae	6	1	16.6667	0	5	0	1	0	0	0	0	0	0	0	0	0.9	0
Passeriformes	Callaeidae	4	1	25	0	2	1	0	0	0	0	1	0	0	0	0	0.6925	0
Passeriformes	Calyptophilidae	2	1	50	0	0	1	1	0	0	0	0	0	0	0	0	0.525	0
Passeriformes	Campephagidae	99	9	9.09091	0	79	10	5	0	3	0	1	0	0	0	1	0.892626	0
Passeriformes	Chloropseidae	13	4	30.7692	0	7	2	1	0	3	0	0	0	0	0	0	0.726923	0
Passeriformes	Cinclidae	5	1	20	0	4	0	1	0	0	0	0	0	0	0	0	0.88	0
Passeriformes	Cisticolidae	163	12	7.36196	0	138	10	6	0	4	0	2	0	0	0	3	0.908834	0
Passeriformes	Corvidae	131	17	12.9771	0	103	11	9	0	4	0	3	0	1	0	0	0.878855	0
Passeriformes	Cotingidae	67	11	16.4179	0	49	7	7	0	2	0	2	0	0	0	0	0.85209	0
Passeriformes	Dasyornithidae	3	2	66.6667	0	1	0	1	0	1	0	0	0	0	0	0	0.55	0
Passeriformes	Dicaeidae	56	2	3.57143	0	50	3	1	0	0	0	1	0	0	0	1	0.936964	0
Passeriformes	Dicruridae	28	3	10.7143	0	23	2	1	0	2	0	0	0	0	0	0	0.9	0
Passeriformes	Emberizidae	44	3	6.81818	0	37	4	1	0	1	0	1	0	0	0	0	0.9175	0
Passeriformes	Estrildidae	141	6	4.25532	0	130	4	4	0	2	0	0	0	0	0	1	0.955319	0
Passeriformes	Eurylaimidae	12	3	25	0	7	2	3	0	0	0	0	0	0	0	0	0.791667	0
Passeriformes	Fringillidae	211	32	15.1659	0	169	9	8	0	12	0	12	0	0	0	1	0.864882	0
Passeriformes	Furnariidae	331	28	8.45921	0	279	24	17	0	6	0	5	0	0	0	0	0.916918	0
Passeriformes	Grallariidae	56	11	19.6429	0	39	6	7	0	2	0	2	0	0	0	0	0.829286	0
Passeriformes	Hirundinidae	89	7	7.86517	0	79	1	4	0	2	0	1	0	0	0	2	0.919888	0
Passeriformes	Hyliotidae	4	1	25	0	3	0	0	0	1	0	0	0	0	0	0	0.8125	0
Passeriformes	Hylocitreidae	2	1	50	0	1	0	0	0	1	0	0	0	0	0	0	0.625	0
Passeriformes	Icteridae	112	14	12.5	0	94	4	7	0	7	0	0	0	0	0	0	0.903125	0
Passeriformes	Lamproliidae	4	2	50	0	1	1	1	0	0	0	1	0	0	0	0	0.5425	0
Passeriformes	Laniidae	33	2	6.06061	0	29	2	1	0	0	0	1	0	0	0	0	0.933939	0
Passeriformes	Leiotrichidae	138	21	15.2174	0	106	11	10	0	8	0	3	0	0	0	0	0.866014	0
Passeriformes	Locustellidae	66	11	16.6667	0	48	7	10	0	1	0	0	0	0	0	0	0.860606	0
Passeriformes	Macrosphenidae	21	2	9.52381	0	18	0	0	0	1	0	1	0	0	0	1	0.874762	0
Passeriformes	Malaconotidae	48	5	10.4167	0	40	3	1	0	4	0	0	0	0	0	0	0.903125	0
Passeriformes	Maluridae	29	4	13.7931	0	24	1	2	0	2	0	0	0	0	0	0	0.894828	0
Passeriformes	Meliphagidae	193	10	5.18135	0	178	4	6	0	2	0	2	0	0	0	1	0.952021	0
Passeriformes	Mimidae	34	6	17.6471	0	27	1	2	0	2	0	2	0	0	0	0	0.858529	0
Passeriformes	Monarchidae	104	16	15.3846	0	64	24	6	0	5	0	5	0	0	0	0	0.80625	0
Passeriformes	Motacillidae	67	8	11.9403	0	55	4	5	0	3	0	0	0	0	0	0	0.900746	0
Passeriformes	Muscicapidae	340	31	9.11765	0	273	35	19	0	10	0	2	0	0	0	1	0.900265	0
Passeriformes	Nectariniidae	147	7	4.7619	0	133	7	4	0	3	0	0	0	0	0	0	0.951701	0
Passeriformes	Nesospingidae	1	1	100	0	0	0	1	0	0	0	0	0	0	0	0	0.4	0
Passeriformes	Notiomystidae	1	1	100	0	0	0	1	0	0	0	0	0	0	0	0	0.4	0
Passeriformes	Oriolidae	39	3	7.69231	0	34	1	1	0	1	0	1	0	0	0	1	0.908205	0
Passeriformes	Pachycephalidae	52	3	5.76923	0	47	2	2	0	0	0	1	0	0	0	0	0.946538	0
Passeriformes	Paradisaeidae	43	2	4.65116	0	35	6	2	0	0	0	0	0	0	0	0	0.923256	0
Passeriformes	Paradoxornithidae	38	4	10.5263	0	33	1	4	0	0	0	0	0	0	0	0	0.927632	0
Passeriformes	Pardalotidae	4	1	25	0	3	0	0	0	1	0	0	0	0	0	0	0.8125	0
Passeriformes	Paridae	61	2	3.27869	0	57	2	1	0	1	0	0	0	0	0	0	0.966393	0
Passeriformes	Parulidae	125	12	9.6	0	102	11	4	0	6	0	2	0	0	0	0	0.89992	0
Passeriformes	Passerellidae	147	9	6.12245	0	124	14	2	0	6	0	1	0	0	0	0	0.921905	0
Passeriformes	Passeridae	43	2	4.65116	0	41	0	2	0	0	0	0	0	0	0	0	0.972093	0
Passeriformes	Pellorneidae	65	7	10.7692	0	41	16	5	0	2	0	0	0	0	0	1	0.829231	0
Passeriformes	Petroicidae	53	4	7.54717	0	45	4	3	0	1	0	0	0	0	0	0	0.925472	0
Passeriformes	Phaenicophilidae	4	1	25	0	2	1	1	0	0	0	0	0	0	0	0	0.7625	0
Passeriformes	Philepittidae	4	1	25	0	2	1	1	0	0	0	0	0	0	0	0	0.7625	0
Passeriformes	Phylloscopidae	80	2	2.5	0	73	5	2	0	0	0	0	0	0	0	0	0.963125	0
Passeriformes	Picathartidae	2	1	50	0	0	1	1	0	0	0	0	0	0	0	0	0.525	0
Passeriformes	Pipridae	53	3	5.66038	0	49	1	2	0	0	0	1	0	0	0	0	0.954151	0
Passeriformes	Pittidae	50	9	18	0	33	7	5	0	3	0	1	0	0	0	1	0.8084	0
Passeriformes	Pityriasidae	1	1	100	0	0	0	1	0	0	0	0	0	0	0	0	0.4	0
Passeriformes	Platysteiridae	34	1	2.94118	0	31	2	0	0	1	0	0	0	0	0	0	0.957353	0
Passeriformes	Ploceidae	124	11	8.87097	0	102	11	4	0	7	0	0	0	0	0	0	0.907258	0
Passeriformes	Pycnonotidae	158	14	8.86076	0	124	19	7	0	5	0	2	0	0	0	1	0.890127	0
Passeriformes	Rhinocryptidae	60	8	13.3333	0	44	8	1	0	6	0	1	0	0	0	0	0.853667	0
Passeriformes	Rhipiduridae	62	1	1.6129	0	54	7	1	0	0	0	0	0	0	0	0	0.950806	0
Passeriformes	Sittidae	32	6	18.75	0	25	1	2	0	3	0	1	0	0	0	0	0.85375	0
Passeriformes	Sturnidae	123	12	9.7561	0	102	9	4	0	4	0	4	0	0	0	0	0.90187	0
Passeriformes	Sylviidae	31	1	3.22581	0	28	2	1	0	0	0	0	0	0	0	0	0.958065	0
Passeriformes	Thamnophilidae	242	22	9.09091	0	205	15	12	0	6	0	4	0	0	0	0	0.915413	0
Passeriformes	Thraupidae	407	47	11.5479	0	334	25	30	0	11	0	6	0	0	0	1	0.898575	0
Passeriformes	Timaliidae	57	5	8.77193	0	41	11	5	0	0	0	0	0	0	0	0	0.879825	0
Passeriformes	Tityridae	49	4	8.16327	0	43	1	3	0	1	0	0	0	0	0	1	0.920408	0
Passeriformes	Troglodytidae	93	8	8.60215	0	81	4	4	0	2	0	2	0	0	0	0	0.924086	0
Passeriformes	Turdidae	177	14	7.9096	0	135	28	8	0	3	0	3	0	0	0	0	0.889887	0
Passeriformes	Tyrannidae	449	30	6.68151	0	403	16	19	0	9	0	2	0	0	0	0	0.943185	0
Passeriformes	Vangidae	40	8	20	0	28	4	3	0	5	0	0	0	0	0	0	0.82625	0
Passeriformes	Vireonidae	66	1	1.51515	0	60	5	1	0	0	0	0	0	0	0	0	0.964394	0
Passeriformes	Zosteropidae	141	19	13.4752	0	101	21	8	0	7	0	4	0	0	0	0	0.851631	0

## Sheet: dataset weight and diet
	Sperm Collection (SC) procedures								Artificial Insemination procedures with fresh samples								Cryopreservation procedures (CR)							Artificial insemination with biobanked samples (ALL)
Number of species	Name	Order	Family	Threat level (IUCN)	Weight (g)	Diet		Number of species	Name	Order	Family	Threat level (IUCN)	Weight (g)	Diet		Number of species	Name	Order	Family	Threat level (IUCN)	Weight (g)	Diet		Number of species	Name	Order	Family	Threat level (IUCN)	Weight (g)	Diet
1	Malurus melanocephalus	Passeriformes	Maluridae	LC	8	Invert		1	Accipiter gentilis	Accipitriformes	Accipitridae	LC	843.5	Vert		1	Gyps fulvus	Accipitriformes	Accipitridae	LC	8350	Vert		1	Phasianus colchicus	Galliformes	Phasianidae	LC	1950	PlantSeed
2	Malurus cyaneus	Passeriformes	Maluridae	LC	11.5	Invert		2	Amazona guildingii	Psittaciformes	Psittacidae	VU	682.5	Omnivore		2	Falco peregrinus	Falconiformes	Falconidae	LC	735	Vert		2	buteo jamaicensis	Accipitriformes	Accipitridae	LC	1028	Vert
3	Serinus canaria	Passeriformes	Fringillidae	LC	17.5	PlantSeed		3	Amazona ventralis	Psittaciformes	Psittacidae	VU	214	Omnivore		3	Aquila chrysaetos	Accipitriformes	Accipitridae	LC	3443.5	Vert		3	Anas acuta	Anseriformes	Anatidae	LC	940	PlantSeed
4	Melospiza georgiana	Passeriformes	Passerellidae	LC	17.6	Omnivore		4	Aquila heliaca	Accipitriformes	Accipitridae	VU	3100	Vert		4	Branta canadensis	Anseriformes	Anatidae	LC	4858	PlantSeed		4	Melopsittacus undulatus	Psittaciformes	Psittaculidae	LC	27.5	PlantSeed
5	Tachycineta bicolor	Passeriformes	Hirundinidae	LC	19.5	Invert		5	Falco peregrinus	Falconiformes	Falconidae	LC	735	Vert		5	Falco rusticolus	Falconiformes	Falconidae	LC	1200	Vert		5	Antigone canadensis	Gruiformes	Gruidae	LC	3400	Omnivore
6	Junco hyemalis	Passeriformes	Passerellidae	LC	20	PlantSeed		6	Alectoris rufa	Galliformes	Phasianidae	NT	513.5	PlantSeed		6	Parabuteo unicinctus	Accipitriformes	Accipitridae	LC	706.5	Vert		6	Nymphicus hollandicus	Psittaciformes	Cacatuidae	LC	90	PlantSeed
7	Ammospiza maritima	Passeriformes	Passerellidae	LC	20.8	Invert		7	Accipiter atricapillus	Accipitriformes	Accipitridae	LC	865	Vert		7	Melopsittacus undulatus	Psittaciformes	Psittaculidae	LC	27.5	PlantSeed		7	Ardeotis arabs	Otidiformes	Otididae	NT	7850	Omnivore
8	Haemorhous mexicanus	Passeriformes	Fringillidae	LC	21.4	PlantSeed		8	Falco sparverius	Falconiformes	Falconidae	LC	111.5	Invert		8	Spheniscus magellanicus	Sphenisciformes	Spheniscidae	LC	5050	Vert		8	Spheniscus magellanicus	Sphenisciformes	Spheniscidae	LC	5050	Vert
9	Fringilla coelebs	Passeriformes	Fringillidae	LC	23	Invert		9	Cyanopsitta spixii	Psittaciformes	Psittacidae	EW	348	Omnivore		9	Dromaius novaehollandiae	Casuariformes	Casuariidae	LC	42500	Omnivore		9	Columba livia	Columbiformes	Columbidae	LC	369	PlantSeed
10	Passer montanus	Passeriformes	Passeridae	LC	23	PlantSeed		10	Pipile cumanensis	Galliformes	Cracidae	LC	1325	Fruit		10	Spheniscus demersus	Sphenisciformes	Spheniscidae	EN	2900	Vert		10	Anser anser	Anseriformes	Anatidae	LC	3580	PlantSeed
11	Melopsittacus undulatus	Psitaciformes	Psittacidae	LC	27.5	PlantSeed		11	Tympanuchus phasianellus	Galliformes	Phasianidae	LC	813.5	PlantSeed		11	Pygoscelis papua	Sphenisciformes	Spheniscidae	LC	6500	Vert		11	Tetrao urogallus	Galliformes	Phasianidae	LC	3800	PlantSeed
12	Passer domesticus	Passeriformes	Passeridae	LC	28	PlantSeed		12	Tragopan caboti	Galliformes	Phasianidae	VU	1400	PlantSeed		12	Aptenodytes patagonicus	Sphenisciformes	Spheniscidae	LC	11999	Vert		12	Branta canadensis	Anseriformes	Anatidae	LC	4858	PlantSeed
13	Charmosyna pulchella	Psitaciformes	Psittacidae	LC	29	Fruit		13	Anas platyrhynchos	Anseriformes	Anatidae	LC	1335	Omnivore		13	Antigone vipio	Gruiformes	Gruidae	VU	5625	PlantSeed		13	Anas platyrhynchos	Anseriformes	Anatidae	LC	1335	Omnivore
14	Agapornis lilianae	Psitaciformes	Psittacidae	NT	32.5	PlantSeed		14	Eudyptes chrysocome	Sphenisciformes	Spheniscidae	VU	2900	Invert		14	Phoenicopterus ruber	Phoenicopteriformes	Phoenicopteridae	LC	3100	Omnivore		14	Numida meleagris	Galliformes	Numididae	LC	1480	PlantSeed
15	Cacomantis flabelliformis	Cuculiformes	Cuculidae	LC	44	Invert		15	Aquila chrysaetos	Accipitriformes	Accipitridae	LC	3443.5	Vert		15	Aquila fasciata	Accipitriformes	Accipitridae	LC	1820	Vert		15	Chrysolophus amherstiae	Galliformes	Phasianidae	LC	737.2	Omnivore
16	Hylocichla mustelina	Passeriformes	Turdidae	LC	45	Invert		16	Falco mexicanus	Falconiformes	Falconidae	LC	760	Vert		16	Aquila adalberti	Accipitriformes	Accipitridae	VU	3000	Vert		16	Syrmaticus mikado	Galliformes	Phasianidae	LC	1157.5	PlantSeed
17	Vini australis	Psitaciformes	Psittacidae	LC	49.5	Fruit		17	Aquila adalberti	Accipitriformes	Accipitridae	VU	3000	Vert		17	Gyps bengalensis	Accipitriformes	Accipitridae	CR	4750	Vert		17	Lophura nycthemera	Galliformes	Phasianidae	LC	1357.5	Omnivore
18	Pyrrhura leucotis	Psittaciformes	Psittacidae	VU	52	PlantSeed		18	Aquila fasciata	Accipitriformes	Accipitridae	LC	1820	Vert		18	Grus americana	Gruiformes	Gruidae	EN	7300	Vert		18	Lophura swinhoii	Galliformes	Phasianidae	NT	1100	PlantSeed
19	Monticola saxatilis	Passeriformes	Muscicapidae	LC	52.5	Invert		19	Chlamydotis undulata	Otidiformes	Otididae	VU	2500	Omnivore		19	Phasianus colchicus	Galliformes	Phasianidae	LC	1950	PlantSeed		19	Tragopan blythii	Galliformes	Phasianidae	VU	1700	Omnivore
20	Agapornis roseicollis	Psitaciformes	Psittacidae	LC	53	PlantSeed		20	Chlamydotis macqueenii	Otidiformes	Otididae	VU	2500	Omnivore		20	Lyrurus tetrix	Galliformes	Phasianidae	LC	1175	PlantSeed		20	Tragopan caboti	Galliformes	Phasianidae	VU	1150	PlantSeed
21	Agapornis taranta	Psitaciformes	Psittacidae	LC	57.5	Omnivore		21	Pavo cristatus	Galliformes	Phasianidae	LC	5000	PlantSeed		21	Tetrao urogallus	Galliformes	Phasianidae	LC	3800	PlantSeed		21	Lophophorus impeyanus	Galliformes	Phasianidae	LC	2080	PlantSeed
22	Glossopsitta concinna	Psitaciformes	Psittacidae	LC	58.5	Omnivore		22	Nymphicus hollandicus	Psittaciformes	Cacatuidae	LC	90	PlantSeed		22	Alectoris barbara	Galliformes	Phasianidae	LC	461	PlantSeed
23	Psephotus haematonotus	Psitaciformes	Psittacidae	LC	62	PlantSeed		23	Spheniscus magellanicus	Sphenisciformes	Spheniscidae	LC	5050	Vert		23	Antigone canadensis	Gruiformes	Gruidae	LC	3400	Omnivore
24	Brotogeris chrysopterus	Psittaciformes	Psittacidae	LC	63	Fruit		24	Cairina moschata	Anseriformes	Anatidae	LC	2685	Omnivore		24	Anser Anser	Anseriformes	Anatidae	LC	3580	PlantSeed
25	Pyrrhura picta	Psittaciformes	Psittacidae	LC	65	Omnivore		25	Antigone antigone	Gruiformes	Gruidae	VU	9520	PlantSeed		25	Anas platyrhynchos	Anseriformes	Anatidae	LC	1335	Omnivore
26	Brotogeris chrysoptera	Psittaciformes	Psittacidae	LC	67	Fruit		26	Anser cygnoides	Anseriformes	Anatidae	EN	3150	PlantSeed		26	Anser cygnoides	Anseriformes	Anatidae	EN	3150	PlantSeed
27	Euphagus cyanocephalus	Passeriformes	Icteridae	LC	67	Invert		27	Aix galericulata	Anseriformes	Anatidae	LC	632	PlantSeed		27	Cairina moschata	Anseriformes	Anatidae	LC	2685	Omnivore
28	Trichoglossus euteles	Psittaciformes	Psittacidae	LC	74	Fruit		28	Cacatua leadbeateri	Psittaciformes	Cacatuidae	LC	420	PlantSeed
29	Pyrrhura melanura	Psittaciformes	Psittacidae	LC	75	Fruit		29	Cacatua haematuropygia	Psittaciformes	Cacatuidae	CR	300	Omnivore
30	Pyrrhura rupicola	Psittaciformes	Psittacidae	LC	75	Fruit		30	Cacatua sulphurea	Psittaciformes	Cacatuidae	CR	350	Omnivore
31	Pyrrhura hoffmanni	Psittaciformes	Psittacidae	LC	82	Omnivore		31	Cacatua galerita	Psittaciformes	Cacatuidae	LC	895	PlantSeed
32	Pyrrhura perlata	Psittaciformes	Psittacidae	LC	87	Fruit		32	Cacatua pastinator	Psittaciformes	Cacatuidae	LC	700	PlantSeed
33	Eupsittula pertinax	Psittaciformes	Psittacidae	LC	89	PlantSeed		33	Cacatua tenuirostris	Psittaciformes	Cacatuidae	LC	550	PlantSeed
34	Nymphicus hollandicus	Psittaciformes	Cacatuidae	LC	90	PlantSeed		34	Cacatua ducorpsii	Psittaciformes	Cacatuidae	LC	360	Omnivore
35	Pyrrhura cruentata	Psittaciformes	Psittacidae	VU	90	Omnivore		35	Cacatua sanguinea	Psittaciformes	Cacatuidae	LC	505	PlantSeed
36	Charmosyna papou	Psittaciformes	Psittacidae	LC	93.5	Omnivore		36	Cacatua goffiniana	Psittaciformes	Cacatuidae	NT	300	PlantSeed
37	Myiopsitta monachus	Psittaciformes	Psittacidae	LC	105	PlantSeed		37	Cacatua ophthalmica	Psittaciformes	Cacatuidae	VU	535	Omnivore
38	Pionopsitta pileata	Psittaciformes	Psittacidae	LC	109	PlantSeed		38	Cacatua moluccensis	Psittaciformes	Cacatuidae	VU	850	Omnivore
39	Eos squamata	Psittaciformes	Psittacidae	LC	110	Fruit		39	Calyptorhynchus banksii	Psittaciformes	Cacatuidae	LC	720	Omnivore
40	Falco sparverius	Falconiformes	Falconidae	LC	111.5	Invert		40	Zanda funerea	Psittaciformes	Cacatuidae	LC	755	Omnivore
41	Poicephalus rueppellii	Psittaciformes	Psittacidae	LC	119	Omnivore		41	Zanda latirostris	Psittaciformes	Cacatuidae	EN	675	PlantSeed
42	Eupsittula cactorum	Psittaciformes	Psittacidae	LC	120	PlantSeed		42	Callocephalon fimbriatum	Psittaciformes	Cacatuidae	VU	280	Omnivore
43	Aratinga solstitialis	Psittaciformes	Psittacidae	EN	120.5	Fruit		43	Eolophus roseicapilla	Psittaciformes	Cacatuidae	LC	345	PlantSeed
44	Trichoglossus haematodus	Psittaciformes	Psittacidae	LC	123	Fruit		44	Probosciger aterimus	Psittaciformes	Cacatuidae	NT	775	PlantSeed
45	Psittacula derbiana	Psittaciformes	Psittacidae	NT	125	Omnivore		45	Anodorhynchus hyacinthinus	Psittaciformes	Psittacidae	VU	1565	Fruit
46	Aratinga auricapillus	Psittaciformes	Psittacidae	LC	130	Omnivore		46	Anodorhynchus leari	Psittaciformes	Psittacidae	EN	940	Fruit
47	Poicephalus meyeri	Psittaciformes	Psittacidae	LC	132	PlantSeed		47	Ara ambiguus	Psittaciformes	Psittacidae	CR	1347.5	Omnivore
48	Platycercus elegans	Psittaciformes	Psittacidae	LC	134	PlantSeed		48	Ara chloropterus	Psittaciformes	Psittacidae	LC	1379	PlantSeed
49	Lorius garrulus	Psittaciformes	Psittacidae	VU	140	Fruit		49	Ara glaucogularis	Psittaciformes	Psittacidae	CR	700	Fruit
50	Poicephalus senegalus	Psittaciformes	Psittacidae	LC	140	PlantSeed		50	Ara militaris	Psittaciformes	Psittacidae	VU	1053	Fruit
51	Pteroglossus bailloni	Piciformes	Ramphastidae	NT	148.5	Fruit		51	Diopsittaca nobilis	Psittaciformes	Psittacidae	LC	150	Omnivore
52	Diopsittaca nobilis	Psittaciformes	Psittacidae	LC	150	Omnivore		52	Primolius couloni	Psittaciformes	Psittacidae	VU	250.5	Omnivore
53	Accipiter nisus	Accipitriformes	Accipitridae	LC	150.5	Vert		53	Amazona pretrei	Psittaciformes	Psittacidae	VU	280	Fruit
54	Alisterus amboinensis	Psittaciformes	Psittacidae	LC	154	PlantSeed		54	Amazona vinacea	Psittaciformes	Psittacidae	EN	370	PlantSeed
55	Pseudeos fuscata	Psittaciformes	Psittacidae	LC	154.5	Fruit		55	Amazona xantholora	Psittaciformes	Psittacidae	LC	232	Fruit
56	Psittacula calthrapae	Psittaciformes	Psittacidae	LC	155	Fruit		56	Amazona rhodocorytha	Psittaciformes	Psittacidae	VU	400	Fruit
57	Psittacula himalayana	Psittaciformes	Psittacidae	LC	155	PlantSeed		57	Amazona brasiliensis	Psittaciformes	Psittacidae	NT	500	Omnivore
58	Barnardius zonarius	Psittaciformes	Psittacidae	LC	160	Fruit		58	Amazona albifrons	Psittaciformes	Psittacidae	LC	209	PlantSeed
59	Alisterus chloropterus	Psittaciformes	Psittacidae	LC	164	Omnivore		59	Amazona tucumana	Psittaciformes	Psittacidae	VU	265	PlantSeed
60	Selenidera maculirostris	Ramphastidae	Piciformes	LC	165	Fruit		60	Amazona amazonica	Psittaciformes	Psittacidae	LC	383.5	Fruit
61	Eos histrio	Psittaciformes	Psittacidae	EN	175	Fruit		61	Amazona finschi	Psittaciformes	Psittacidae	EN	303.5	Omnivore
62	Thectocercus acuticaudatus	Psittaciformes	Psittacidae	LC	179.2	Omnivore		62	Amazona viridigenalis	Psittaciformes	Psittacidae	EN	320	PlantSeed
63	Falco subbuteo	Falconiformes	Falconidae	LC	181.5	Invert		63	Amazona barbadensis	Psittaciformes	Psittacidae	NT	316.2	PlantSeed
64	Lorius chlorocercus	Psittaciformes	Psittacidae	LC	189	Fruit		64	Amazona dufresniana	Psittaciformes	Psittacidae	NT	435	Omnivore
65	Psittacara wagleri	Psittaciformes	Psittacidae	NT	189	PlantSeed		65	Amazona farinosa	Psittaciformes	Psittacidae	LC	620	Omnivore
66	Tanygnathus lucionensis	Psittaciformes	Psittacidae	NT	189.5	Omnivore		66	Amazona festiva	Psittaciformes	Psittacidae	LC	430	Fruit
67	Falco tinnunculus	Falconiformes	Falconidae	LC	194	Vert		67	Amazona autumnalis	Psittaciformes	Psittacidae	LC	399.5	Fruit
68	Guaruba guarouba	Psittaciformes	Psittacidae	VU	194	Fruit		68	Alipiopsitta xanthops	Psittaciformes	Psittacidae	NT	300	Omnivore
69	Amazona albifrons	Psittaciformes	Psittacidae	LC	209	PlantSeed		69	Eos histrio	Psittaciformes	Psittaculidae	EN	175	Fruit
70	Pionus chalcopterus	Psittaciformes	Psittacidae	NT	210	Fruit		70	Eos squamata	Psittaciformes	Psittaculidae	LC	110	Fruit
71	Lorius lory	Psittaciformes	Psittacidae	LC	211.5	Fruit		71	Chalcopsitta scintillata	Psittaciformes	Psittaculidae	LC	212.5	Fruit
72	Chalcopsitta scintillata	Psittaciformes	Psittacidae	LC	212.5	Fruit		72	Chalcopsitta atra	Psittaciformes	Psittaculidae	LC	260	Fruit
73	Amazona ventralis	Psittaciformes	Psittacidae	VU	214	Omnivore		73	Charmosyna papou	Psittaciformes	Psittaculidae	LC	93.5	Omnivore
74	Amazona xantholora	Psittaciformes	Psittacidae	LC	232	Fruit		74	Charmosyna pulchella	Psittaciformes	Psittaculidae	LC	29	Fruit
75	Deroptyus accipitrinus	Psittaciformes	Psittacidae	LC	245	PlantSeed		75	Glossopsitta concinna	Psittaciformes	Psittaculidae	LC	58.5	Omnivore
76	Primolius auricollis	Psittaciformes	Psittacidae	LC	245	Omnivore		76	Lorius lory	Psittaciformes	Psittaculidae	LC	211.5	Fruit
77	Pteroglossus aracari	Ramphastidae	Piciformes	LC	250	Fruit		77	Lorius garrulus	Psittaciformes	Psittaculidae	VU	140	Fruit
78	Primolius couloni	Psittaciformes	Psittacidae	VU	250.5	Omnivore		78	Lorius chlorocercus	Psittaciformes	Psittaculidae	LC	189	Fruit
79	Tanygnathus sumatranus	Psittaciformes	Psittacidae	LC	253.5	Fruit		79	Trichoglossus haematodus	Psittaciformes	Psittaculidae	LC	123	Fruit
80	Primolius maracana	Psittaciformes	Psittacidae	NT	256	PlantSeed		80	Trichoglossus euteles	Psittaciformes	Psittaculidae	LC	74	Fruit
81	Chalcopsitta atra	Psittaciformes	Psittacidae	LC	260	Fruit		81	Pseudeos fuscata	Psittaciformes	Psittacidae	LC	154.5	Fruit
82	Amazona tucumana	Psittaciformes	Psittacidae	VU	265	PlantSeed		82	Vini australis	Psittaciformes	Psittaculidae	LC	49.5	Fruit
83	Amazona pretrei	Psittaciformes	Psittacidae	VU	280	Fruit		83	Eclectus roratus	Psittaciformes	Psittaculidae	LC	550	PlantSeed
84	Callocephalon fimbriatum	Psittaciformes	Cacatuidae	VU	280	Omnivore		84	Tanygnathus lucionensis	Psittaciformes	Psittaculidae	NT	189.5	Omnivore
85	Cyanoliseus patagonus	Psittaciformes	Psittacidae	LC	296.5	PlantSeed		85	Tanygnathus sumatranus	Psittaciformes	Psittaculidae	LC	253.5	Fruit
86	Alipiopsitta xanthops	Psittaciformes	Psittacidae	NT	300	Omnivore		86	Agapornis lilianae	Psittaciformes	Psittaculidae	NT	32.5	PlantSeed
87	Cacatua goffiniana	Psittaciformes	Cacatuidae	NT	300	PlantSeed		87	Agapornis taranta	Psittaciformes	Psittaculidae	LC	57.5	Omnivore
88	Cacatua haematuropygia	Psittaciformes	Cacatuidae	CR	300	Omnivore		88	Alisterus amboinensis	Psittaciformes	Psittaculidae	LC	164	PlantSeed
89	Amazona finschi	Psittaciformes	Psittacidae	EN	303.5	Omnivore		89	Alisterus chloropterus	Psittaciformes	Psittaculidae	LC	160	Omnivore
90	Amazona barbadensis	Psittaciformes	Psittacidae	NT	316.2	PlantSeed		90	Eupsittula pertinax	Psittaciformes	Psittacidae	LC	89	PlantSeed
91	Amazona viridigenalis	Psittaciformes	Psittacidae	EN	320	PlantSeed		91	Aratinga solstitialis	Psittaciformes	Psittacidae	EN	120.5	Fruit
92	Ramphastos dicolorus	Ramphastidae	Piciformes	LC	332.5	Fruit		92	Eupsittula cactorum	Psittaciformes	Psittacidae	LC	120	PlantSeed
93	Ara severus	Psittaciformes	Psittacidae	LC	336	PlantSeed		93	Psittacara wagleri	Psittaciformes	Psittacidae	NT	189	PlantSeed
94	Eolophus roseicapilla	Psittaciformes	Cacatuidae	LC	345	PlantSeed		94	Barnardius zonarius	Psittaciformes	Psittaculidae	LC	160	Fruit
95	Poicephalus robustus	Psittaciformes	Psittacidae	VU	347	Fruit		95	Brotogeris chrysopterus	Psittaciformes	Psittacidae	LC	63	Fruit
96	Cyanopsitta spixii	Psittaciformes	Psittacidae	EW	348	Omnivore		96	Cyanoliseus patagonus	Psittaciformes	Psittacidae	LC	296.5	PlantSeed
97	Cacatua sulphurea	Psittaciformes	Cacatuidae	CR	350	Omnivore		97	Deroptyus accipitrinus	Psittaciformes	Psittacidae	LC	245	PlantSeed
98	Cacatua ducorpsii	Psittaciformes	Cacatuidae	LC	360	Omnivore		98	Guaruba guarouba	Psittaciformes	Psittacidae	VU	194	Fruit
99	Columba livia	Columbiformes	Columbidae	LC	369	PlantSeed		99	Nestor notabilis	Psittaciformes	Strigopidae	EN	922	PlantSeed
100	Amazona vinacea	Psittaciformes	Psittacidae	EN	370	PlantSeed		100	Psittacula calthrapae	Psittaciformes	Psittaculidae	LC	155	Fruit
101	Psittacus timneh	Psittaciformes	Psittacidae	EN	375	Omnivore		101	Psittacula derbiana	Psittaciformes	Psittaculidae	NT	125	Omnivore
102	Rissa tridactyla	Charadriiformes	Laridae	VU	382.5	Omnivore		102	Psittacula himalayana	Psittaciformes	Psittaculidae	LC	155	PlantSeed
103	Amazona amazonica	Psittaciformes	Psittacidae	LC	383.5	Fruit		103	Psittacus timneh	Psittaciformes	Psittacidae	EN	375	Omnivore
104	Amazona autumnalis	Psittaciformes	Psittacidae	LC	399.5	Fruit		104	Pionopsitta pileata	Psittaciformes	Psittacidae	LC	109	PlantSeed
105	Amazona aestiva	Psittaciformes	Psittacidae	LC	400	Omnivore		105	Platycercus elegans	Psittaciformes	Psittaculidae	LC	134	PlantSeed
106	Amazona rhodocorytha	Psittaciformes	Psittacidae	VU	400	Fruit		106	Poicephalus robustus	Psittaciformes	Psittacidae	VU	347	Fruit
107	Cacatua leadbeateri	Psittaciformes	Cacatuidae	LC	420	PlantSeed		107	Poicephalus meyeri	Psittaciformes	Psittacidae	LC	132	PlantSeed
108	Amazona festiva	Psittaciformes	Psittacidae	LC	430	Fruit		108	Poicephalus senegalus	Psittaciformes	Psittacidae	LC	140	PlantSeed
109	Amazona dufresniana	Psittaciformes	Psittacidae	NT	435	Omnivore		109	Poicephalus rueppellii	Psittaciformes	Psittacidae	LC	119	Omnivore
110	Polyplectron napoleonis	Galliformes	Phasianidae	VU	436	Omnivore		110	Psephotus haematonotus	Psittaciformes	Psittaculidae	LC	62	PlantSeed
111	Amazona ochrocephala	Psittaciformes	Psittacidae	LC	437.5	PlantSeed		111	Psittrichas fulgidus	Psittaciformes	Psittaculidae	VU	750	Fruit
112	Alectoris barbara	Galliformes	Phasianidae	LC	461	PlantSeed		112	Pyrrhura cruentata	Psittaciformes	Psittacidae	VU	90	Omnivore
113	Tyto alba	Strigiformes	Tytonidae	LC	480	Vert		113	Pyrrhura picta	Psittaciformes	Psittacidae	LC	65	Omnivore
114	Amazona brasiliensis	Psittaciformes	Psittacidae	NT	500	Omnivore		114	Pyrrhura leucotis	Psittaciformes	Psittacidae	VU	52	PlantSeed
115	Cacatua sanguinea	Psittaciformes	Cacatuidae	LC	505	PlantSeed		115	Pyrrhura hoffmanni	Psittaciformes	Psittacidae	LC	82	Omnivore
116	Alectoris rufa	Galliformes	Phasianidae	NT	513.5	PlantSeed		116	Pyrrhura melanura	Psittaciformes	Psittacidae	LC	75	Fruit
117	Cacatua ophthalmica	Psittaciformes	Cacatuidae	VU	535	Omnivore		117	Pyrrhura rupicola	Psittaciformes	Psittacidae	LC	75	Fruit
118	Cacatua tenuirostris	Psittaciformes	Cacatuidae	LC	550	PlantSeed		118	Pyrrhura perlata	Psittaciformes	Psittacidae	LC	87	Fruit
119	Eclectus roratus	Psittaciformes	Psittacidae	LC	550	PlantSeed		119	Tragopan temminckii	Galliformes	Phasianidae	LC	1290	PlantSeed
120	Amazona farinosa	Psittaciformes	Psittacidae	LC	620	Omnivore		120	Lophophorus impeyanus	Galliformes	Phasianidae	LC	2180	PlantSeed
121	Ramphastos tucanus	Ramphastidae	Piciformes	LC	660	Fruit		121	Lophophorus lhuysii	Galliformes	Phasianidae	VU	2922.5	PlantSeed
122	Asio stygius	Strigiformes	Strigidae	LC	675	Vert		122	Harpia harpyja	Accipitriformes	Accipitridae	VU	4400	Vert
123	Zanda latirostris	Psittaciformes	Cacatuidae	EN	675	PlantSeed
124	Amazona guildingii	Psittaciformes	Psittacidae	VU	682.5	Omnivore
125	Ara glaucogularis	Psittaciformes	Psittacidae	CR	700	Fruit
126	Cacatua pastinator	Psittaciformes	Cacatuidae	LC	700	PlantSeed
127	Parabuteo unicinctus	Accipitriformes	Accipitridae	LC	706.5	Vert
128	Calyptorhynchus banksii	Psittaciformes	Cacatuidae	LC	720	Omnivore
129	Falco peregrinus	Falconiformes	Falconidae	LC	735	Vert
130	Polyplectron bicalcaratum	Galliformes	Phasianidae	LC	739	Omnivore
131	Psittrichas fulgidus	Psittaciformes	Psittacidae	VU	750	Fruit
132	Zanda funerea	Psittaciformes	Cacatuidae	LC	755	Omnivore
133	Falco mexicanus	Falconiformes	Falconidae	LC	760	Vert
134	Chrysolophus amherstiae	Galliformes	Phasianidae	LC	762.5	Omnivore
135	Probosciger aterrimus	Psittaciformes	Cacatuidae	NT	775	PlantSeed
136	Rhynchotus rufescens	Tinamiformes	Tinamidae	LC	810	Omnivore
137	Tympanuchus phasianellus	Galliformes	Phasianidae	LC	813.5	PlantSeed
138	Accipiter gentilis	Accipitriformes	Accipitridae	LC	843.5	Vert
139	Cacatua moluccensis	Psittaciformes	Cacatuidae	VU	850	Omnivore
140	Falco cherrug	Falconiformes	Falconidae	EN	860	Vert
141	Accipiter atricapillus	Accipitriformes	Accipitridae	LC	865	Vert
142	Cacatua galerita	Psittaciformes	Cacatuidae	LC	895	PlantSeed
143	Syrmaticus soemmerringii	Galliformes	Phasianidae	NT	900	Omnivore
144	Nestor notabilis	Pscitaciformes	Strigopidae	EN	922	PlantSeed
145	Anas acuta	Anseriformes	Anatidae	LC	940	PlantSeed
146	Anodorhynchus leari	Psittaciformes	Psittacidae	EN	940	Fruit
147	Spizaetus tyrannus	Accipitriformes	Accipitridae	LC	950	Vert
148	Buteo jamaicensis	Accipitriformes	Accipitridae	LC	1028	Vert
149	Ara militaris	Psittaciformes	Psittacidae	VU	1053	Fruit
150	Lophura swinhoii	Galliformes	Phasianidae	NT	1100	PlantSeed
151	Lophura edwardsi	Galliformes	Phasianidae	CR	1112.5	Omnivore
152	Lyrurus tetrix	Galliformes	Phasianidae	LC	1175	PlantSeed
153	Syrmaticus ellioti	Galliformes	Phasianidae	NT	1180.5	PlantSeed
154	Falco rusticolus	Falconiformes	Falconidae	LC	1200	Vert
155	Dendragapus obscurus	Galliformes	Phasianidae	LC	1221	PlantSeed
156	Nothocrax urumutum	Galliformes	Cracidae	LC	1250	Fruit
157	Pipile jacutinga	Galliformes	Cracidae	EN	1250	Fruit
158	Pucrasia macrolopha	Galliformes	Phasianidae	LC	1275	Omnivore
159	Tragopan temminckii	Galliformes	Phasianidae	LC	1290	PlantSeed
160	Syrmaticus mikado	Galliformes	Phasianidae	NT	1300	PlantSeed
161	Pipile cumanensis	Galliformes	Cracidae	LC	1325	Fruit
162	Anas platyrhynchos	Anseriformes	Anatidae	LC	1335	Omnivore
163	Ara ambiguus	Psittaciformes	Psittacidae	CR	1347.5	Omnivore
164	Ara chloropterus	Psittaciformes	Psittacidae	LC	1379	PlantSeed
165	Tragopan caboti	Galliformes	Phasianidae	VU	1400	PlantSeed
166	Numida meleagris	Galliformes	Numididae	LC	1480	PlantSeed
167	Catreus wallichi	Galliformes	Phasianidae	VU	1525	PlantSeed
168	Anodorhynchus hyacinthinus	Psittaciformes	Psittacidae	VU	1565	Fruit
169	Lophura nycthemera	Galliformes	Phasianidae	LC	1565	Omnivore
170	Bubo virginianus	Strigiformes	Strigidae	LC	1705	Vert
171	Aquila fasciata	Accipitriformes	Accipitridae	LC	1820	Vert
172	Tragopan satyra	Galliformes	Phasianidae	NT	1850	PlantSeed
173	Crossoptilon auritum	Galliformes	Phasianidae	LC	1905	PlantSeed
174	Tragopan blythii	Galliformes	Phasianidae	VU	1930	Omnivore
175	Phasianus colchicus	Galliformes	Phasianidae	LC	1950	PlantSeed
176	Crossoptilon mantchuricum	Galliformes	Phasianidae	VU	2062.5	PlantSeed
177	Branta sandvicensis	Anseriformes	Anatidae	NT	2165	PlantSeed
178	Bubo bubo	Strigiformes	Strigidae	LC	2175	Vert
179	Lophophorus impejanus	Galliformes	Phasianidae	LC	2180	PlantSeed
180	Anthropoides virgo	Gruiformes	Gruidae	LC	2500	PlantSeed
181	Chlamydotis macqueenii	Otidiformes	Otididae	VU	2500	Omnivore
182	Chlamydotis undulata	Otidiformes	Otididae	VU	2500	Omnivore
183	Cairina moschata	Anseriformes	Anatidae	LC	2685	Omnivore
184	Eudyptes chrysocome	Sphenisciformes	Spheniscidae	VU	2900	Invert
185	Eudyptes moseleyi	Sphenisciformes	Spheniscidae	EN	2900	Invert
186	Spheniscus demersus	Sphenisciformes	Spheniscidae	EN	2900	Vert
187	Lophophorus lhuysii	Galliformes	Phasianidae	VU	2922.5	PlantSeed
188	Aquila adalberti	Accipitriformes	Accipitridae	VU	3000	Vert
189	Aquila heliaca	Accipitriformes	Accipitridae	VU	3100	Vert
190	Phoenicopterus ruber	Phoenicopteriformes	Phoenicopteridae	LC	3100	Omnivore
191	Anser cygnoides	Anseriformes	Anatidae	EN	3150	PlantSeed
192	Antigone canadensis	Gruiformes	Gruidae	LC	3400	Omnivore
193	Sarcoramphus papa	Cathartiformes	Cathartidae	LC	3400	Vert
194	Aquila chrysaetos	Accipitriformes	Accipitridae	LC	3443.5	Vert
195	Anser Anser	Anseriformes	Anatidae	LC	3580	PlantSeed
196	Tetrao urogallus	Galliformes	Phasianidae	LC	3800	PlantSeed
197	Grus monacha	Gruiformes	Gruidae	VU	4075	PlantSeed
198	Harpia harpyja	Accipitriformes	Accipitridae	VU	4400	Vert
199	Coscoroba coscoroba	Anseriformes	Anatidae	LC	4601	Vert
200	Gyps bengalensis	Accipitriformes	Accipitridae	CR	4750	Vert
201	Branta canadensis	Anseriformes	Anatidae	LC	4858	PlantSeed
202	Pavo cristatus	Galliformes	Phasianidae	LC	5000	PlantSeed
203	Spheniscus magellanicus	Sphenisciformes	Spheniscidae	LC	5050	Vert
204	Anthropoides paradiseus	Gruiformes	Gruidae	VU	5100	Omnivore
205	Grus grus	Gruiformes	Gruidae	LC	5600	PlantSeed
206	Antigone vipio	Gruiformes	Gruidae	VU	5625	PlantSeed
207	Grus nigricollis	Gruiformes	Gruidae	NT	6000	Omnivore
208	Pygoscelis papua	Sphenisciformes	Spheniscidae	LC	6500	Vert
209	Cygnus melancoryphus	Anseriformes	Anatidae	LC	6650	Vert
210	Antigone rubicunda	Gruiformes	Gruidae	LC	6745	PlantSeed
211	Leucogeranus leucogeranus	Gruiformes	Gruidae	CR	6760	PlantSeed
212	Grus americana	Gruiformes	Gruidae	EN	7300	Vert
213	Ardeotis arabs	Otidiformes	Otididae	NT	7850	Omnivore
214	Gyps fulvus	Accipitriformes	Accipitridae	LC	8350	Vert
215	Bugeranus carunculatus	Gruiformes	Gruidae	VU	8400	PlantSeed
216	Grus japonensis	Gruiformes	Gruidae	VU	8500	Omnivore
217	Antigone antigone	Gruiformes	Gruidae	VU	9520	PlantSeed
218	Aptenodytes patagonicus	Sphenisciformes	Spheniscidae	LC	11999	Vert
219	Rhea americana	Rheiformes	Rheidae	NT	30000	Omnivore
220	Casuarius casuarius	Casuariformes	Casuaridae	LC	31500	Fruit
221	Dromaius novaehollandiae	Casuariformes	Casuaridae	LC	42500	Omnivore
222	Struthio camelus	Struthioniformes	Struthionidae	LC	128000	Omnivore

## Sheet: Dataset references
1. Abouelezz, F.M.K., Castaño, C., Toledano-Díaz, A., Esteso, M.C., López-Sebastián, A., Dávila, S.G., Gil, M.G., Cuenca, O.T., Campo, J.L., Blesbois, E., Santiago-Moreno, J., 2015. Successful use of artificial insemination in the production of red-le
2. Aia, B., Awad, A.L., AEl-sawy, M., Fatouh, M.H., Ibrahiem, A., n.d. EFFECT OF FREQUENCY OF SEMEN COLLECTION, DILUTION RATE AND INSEMINATION DOSE ON SEMEN CHARACTERISTICS AND FERTILITY OF DOMYATI DUCKS, Poult. Sci.
3. Al-Daraji, H.J., Al-Shemmary, 2016. Effect of breed of falcon on semen quality traits. Internation Journal of Conservation Science
4. Ancuelo, A.E., Landicho, M.M., Dichoso, G.A., Sangel, P.P., 2021a. Superoxide Dismutase (SOD) Activity in Cryopreserved Semen of Itik Pinas-Khaki (Anas platyrhynchos L.). Tropical Animal Science Journal 44, 138–145. https://doi.org/10.5398/tasj.2021.44.2.138
5. Anderson, S.J., Bird, D.M., Hagen, M.D., 2002. Semen characteristics of the quaker parakeet ( Myiopsitta monachus ). Zoo Biol 21, 507–512. https://doi.org/10.1002/zoo.10060
6. Andrea Dogliero, Ada Rota, Renato Lofiego, Mitzy Mauthe von Degerfeld, Giuseppe Quaranta, 2017. Semen Collection and Spermatozoa Characteristics in the Kea Parrot (Nestor notabilis). J Avian Med Surg 31.
7. Angelique DellaVolpe, Volker Schmidt, Maria-Elisabeth Krautwald-Junghanns, 2011. Attempted Semen Collection Using the Massage Technique in Blue-fronted Amazon Parrots (Amazona aestiva aestiva). Journal of Avian Medicine and Surgery 25.
8. Atanasov, V., Gerzilov, V., Dyshlianova, E., 2007. Comparison of biochemical parameters of Muscovy drake semen diluted and stored at 4 °C in three buffers. Anim Reprod Sci 100, 329–337. https://doi.org/10.1016/j.anireprosci.2006.08.014
9. Berry, R.B., 1972. Reproduction by Artificial Insemination in Captive American Goshawks. J Wildl Manage 36, 1283. https://doi.org/10.2307/3799265
10. Bird, D.M., Laguë, P.C., 1977. Semen production of the American kestrel. Can J Zool 55, 1351–1358. https://doi.org/10.1139/z77-175
11. Blanco, J.M., Gee, G., Wildt, D.E., Donoghue, A.M., 2000. Species Variation in Osmotic, Cryoprotectant, and Cooling Rate Tolerance in Poultry, Eagle, and Peregrine Falcon Spermatozoa1. Biol Reprod 63, 1164–1171. https://doi.org/10.1095/biolreprod63.4.1164
12. Blanco, J.M., Long, J.A., Gee, G., Wildt, D.E., Donoghue, A.M., 2012. Comparative cryopreservation of avian spermatozoa: Effects of freezing and thawing rates on turkey and sandhill crane sperm cryosurvival. Anim Reprod Sci 131, 1–8. https://doi.org/10.1016/j.anireprosci.2012.02.001
13. Blanco, J.M., Long, J.A., Gee, G., Wildt, D.E., Donoghue, A.M., 2011. Comparative cryopreservation of avian spermatozoa: Benefits of non-permeating osmoprotectants and ATP on turkey and crane sperm cryosurvival. Anim Reprod Sci 123, 242–248. https://doi.org/10.1016/j.anireprosci.2010.12.005
14. Blesbois, E., Grasseau, I., Seigneurin, F., 2005. Membrane fluidity and the ability of domestic bird spermatozoa to survive cryopreservation. Reproduction 129, 371–378. https://doi.org/10.1530/rep.1.00454
15. Bonato, M., Malecki, I.A., Rybnik-Trzaskowska, P.K., Cornwallis, C.K., Cloete, S.W.P., 2014. Predicting ejaculate quality and libido in male ostriches: Effect of season and age. Anim Reprod Sci 151, 49–55. https://doi.org/10.1016/j.anireprosci.2014.09.015
16. Bonato, M., Rybnik, P.K., Malecki, I.A., Cornwallis, C.K., Cloete, S.W.P., 2011. Twice daily collection yields greater semen output and does not affect male libido in the ostrich. Anim Reprod Sci 123, 258–264. https://doi.org/10.1016/j.anireprosci.2011.01.007
17. Bonato, M., Rybnik, P.K., Malecki, I.A., Cornwallis, C.K., Cloete, S.W.P., 2010. Between male variation in semen characteristics and preliminary results on the dilution of semen in the ostrich, South African Journal of Animal Science.
18. Boyd, L.L., Boyd, N.S., Dobler, F.C., 1977. Reproduction of Prairie Falcons by Artificial Insemination. J Wildl Manage 41, 266. https://doi.org/10.2307/3800603
19. BROCK, M.K., BIRD, D.M., ANSAH, G.A., 1984. Cryogenic preservation of spermatozoa of the American kestrel. International Zoo Yearbook 23, 67–71. https://doi.org/10.1111/j.1748-1090.1984.tb03003.x
20. Brown, M.E., Converse, S.J., Chandler, J.N., Crosier, A.L., Lynch, W., Wildt, D.E., Keefer, C.L., Songsasen, N., 2017. Time within reproductive season, but not age or inbreeding coefficient, affects seminal and sperm quality in the whooping crane (Grus americana). Reprod Fertil Dev 29, 294–306. https://doi.org/10.1071/RD15251
21. Brown, M.E., Singh, R.P., Pukazhenthi, B., Keefer, C.L., Songsasen, N., 2018. Cryopreservation effects on sperm function and fertility in two threatened crane species. Cryobiology 82, 148–154. https://doi.org/10.1016/j.cryobiol.2018.01.010
22. Bublat, A., Fischer, D., Bruslund, S., Schneider, H., Meinecke-Tillmann, S., Wehrend, A., Lierz, M., 2017. Seasonal and genera-specific variations in semen availability and semen characteristics in large parrots. Theriogenology 91, 82–89. https://doi.org/10.1016/j.theriogenology.2016.11.029
23. Cardoso, B., Sánchez-Ajofrín, I., Castaño, C., García-Álvarez, O., Esteso, M.C., Maroto-Morales, A., Iniesta-Cuerda, M., Garde, J.J., Santiago-Moreno, J., Soler, A.J., 2020. Optimization of Sperm Cryopreservation Protocol for Peregrine Falcon (Falco peregrinus). Animals 10, 691. https://doi.org/10.3390/ani10040691
24. Carreira, J.T., Lesobre, L., Boullenger, S., Chalah, T., Lacroix, F., Hingrat, Y., 2022. Assisted Reproduction Techniques to Improve Reproduction in a Non-Model Species: The Case of the Arabian Bustard (Ardeotis arabs) Conservation Breeding Program. Animals 12, 851. https://doi.org/10.3390/ani12070851
25. Castillo, A., Lenzi, C., Pirone, A., Baglini, A., Cerolini, S., Iaffaldano, N., Sartore, S., Russo, C., Schiavone, A., Marzoni Fecia di Cossato, M., 2021a. Optimization of a Protocol for the Cryopreservation of Sperm in Pellets for the Common Pheasant (Phasianus colchicus mongolicus). Animals 11, 2472. https://doi.org/10.3390/ani11082472
26. Castillo, A., Lenzi, C., Pirone, A., Baglini, A., Russo, C., Soglia, D., Schiavone, A., Marzoni Fecia di Cossato, M., 2021b. From the Semen Collection Method to the Hatchlings: The Use of Cryopreserved Sperm from Pheasants Fed an Antioxidant-Enriched Diet. Animals 11, 2624. https://doi.org/10.3390/ani11092624
27. Castillo, A., Taddei, A.R., Schiavone, A., Fausto, A.M., Marzoni Fecia di Cossato, M., 2022. Semen qualitative parameters and spermatozoon ultrastructure of Phasianus colchicus mongolicus. Ital J Anim Sci 21, 1151–1159. https://doi.org/10.1080/1828051X.2022.2098837
28. Chen, Y.-C., Liu, H.-C., Wei, L.-Y., Huang, J.-F., Lin, C.-C., Blesbois, E., Chen, M.-C., 2016a. Sperm Quality Parameters and Reproductive Efficiency in Muscovy Duck (&lt;i&gt;Cairina moschata&lt;/i&gt;). J Poult Sci 53, 223–232. https://doi.org/10.2141/jpsa.0150162
29. Chen, Y.-C., Liu, H.-C., Wei, L.-Y., Huang, J.-F., Lin, C.-C., Blesbois, E., Chen, M.-C., 2016b. Sperm Quality Parameters and Reproductive Efficiency in Muscovy Duck (&lt;i&gt;Cairina moschata&lt;/i&gt;). J Poult Sci 53, 223–232. https://doi.org/10.2141/jpsa.0150162
30. Cheng, F., Guo, T., Wu, J., Lin, T., Ursem, P., Colenbrander, B., Fung, H., 2002. Annual variation in semen characteristics of pigeons (Columba livia). Poult Sci 81, 1050–1056. https://doi.org/10.1093/ps/81.7.1050
31. Ciereszko, A., Dietrich, G.J., Liszewska, E., Krzywiński, A., Kobus, A., 2011. Short-term storage and cryopreservation of black grouse Tetrao tetrix and capercaillie T. urogallus semen. Eur J Wildl Res 57, 383–388. https://doi.org/10.1007/s10344-010-0436-3
32. Ciereszko, A., Rybnik, P.K., Horbańczuk, J.O., Dietrich, G.J., Deas, A., Słowińska, M., Liszewska, E., Malecki, I.A., 2010. Biochemical characterization and sperm motility parameters of ostrich (Struthio camelus) semen. Anim Reprod Sci 122, 222–228. https://doi.org/10.1016/j.anireprosci.2010.08.014
33. Cramer, E.R.A., Rowe, M., Eroukhmanoff, F., Lifjeld, J.T., Sætre, G.-P., Johnsen, A., 2019. Measuring sperm swimming performance in birds: effects of dilution, suspension medium, mechanical agitation, and sperm number. J Ornithol 160, 1053–1063. https://doi.org/10.1007/s10336-019-01672-9
34. Cruz-Valencia, C., Herrera-Barragán, J.A., Gual-Sill, F., Pérez-Rivero, J.J., Soto-Guerrero, Z.A., Rodriguez-Hernández, F., Rivera-Martínez, J.G., 2021. Viability of in vitro preserved sperm of harris’s hawk (Parabuteo unicinctus). Veterinary Research Forum 12, 137–141. https://doi.org/10.30466/vrf.2020.106719.2534
35. David, M., Laguë, P.C., 2024. Management Practices for Captive Kestrels Used As Semen Donors for Artificial Insemination, Journal of Raptor Research.
36. DeMatteo, K.E., Karagiannis, K.L., Asa, C.S., Macek, M.S., Snyder, T.L., Tieber, A.M., Parker, P.G., 2004. SEMEN COLLECTION AND ARTIFICIAL INSEMINATION IN THE COMMON PIPING GUAN (PIPILE CUMANENSIS CUMANENSIS): POTENTIAL APPLICATIONS FOR CRACIDAE (AVES: GALLIFORMES). Journal of Zoo and Wildlife Medicine 35, 447–458. https://doi.org/10.1638/03-088
37. Dogliero, A., Rota, A., Lofiego, R., Mauthe von Degerfeld, M., Quaranta, G., 2016. Semen evaluation in four autochthonous wild raptor species using computer-aided sperm analyzer. Theriogenology 85, 1113–1117. https://doi.org/10.1016/j.theriogenology.2015.11.023
38. Dogliero, A., Rota, A., von Degerfeld, M.M., Quaranta, G., 2015. Use of computer-assisted semen analysis for evaluation of Rosy-faced lovebird (Agapornis roseicollis) semen collected in different periods of the year. Theriogenology 83, 103–106. https://doi.org/10.1016/j.theriogenology.2014.08.013
39. Durrant, B.S., Burch, C.D., Yamada, J.K., Good, J., 1995. Seminal characteristics and artificial insemination of Chinese pheasants, Tragopan temminckii, Lophophorus impeyanus , and Lophophorus lhuysii. Zoo Biol 14, 523–531. https://doi.org/10.1002/zoo.1430140605
40. Fausto, A.M., Taddei, A.R., Batocco, F., Belardinelli, M.C., Carcupino, M., Schiavone, A., Saia, S., Castillo, A., Marzoni, M., 2023. Raptors bred in captivity: semen characteristics and assisted reproduction outcome in goshawk (Accipiter gentilis). PeerJ 11, e15094. https://doi.org/10.7717/peerj.15094
41. Fischer, D., de Oliveira, M.J., Baumgartner, K., Will, H., Wu, S., Bosso, P., Ferreira Teles, P.H., Cubas, Z.S., Lierz, M., von Fersen, L., 2022. A pilot study about assisted reproduction in harpy eagles (Harpia harpyja) in the course of species conservation including collection, storage, and analysis of semen. Theriogenology 181, 190–201. https://doi.org/10.1016/j.theriogenology.2022.01.012
42. Fischer, Dominik, Neumann, D., Purchase, C., Bouts, T., Meinecke-Tillmann, S., Wehrend, A., Lierz, M., 2014. The use of semen evaluation and assisted reproduction in Spix’s macaws in terms of species conservation. Zoo Biol 33, 234–244. https://doi.org/10.1002/zoo.21129
43. Fischer, D., Neumann, D., Wehrend, A., Lierz, M., 2014. Comparison of conventional and computer-assisted semen analysis in cockatiels (Nymphicus hollandicus) and evaluation of different insemination dosages for artificial insemination. Theriogenology 82, 613–620. https://doi.org/10.1016/j.theriogenology.2014.05.023
44. Fischer, D., Schneider, H., Meinecke-Tillmann, S., Wehrend, A., Lierz, M., 2020. Semen analysis and successful artificial insemination in the St. Vincent amazon (Amazona guildingii). Theriogenology 148, 132–139. https://doi.org/10.1016/j.theriogenology.2020.03.004
45. Frediani, M.H., Guida, F.J.V., Salgado, P.A.B., Gonçalves, D.R., Blank, M.H., Novaes, G.A., Pereira, R.J.G., 2019. Semen collection by electro-stimulation in a variety of bird orders. Theriogenology 125, 140–151. https://doi.org/10.1016/j.theriogenology.2018.10.023
46. García-Herreros, M., 2016. Sperm subpopulations in avian species: A comparative study between the rooster (Gallus domesticus) and Guinea fowl (Numida meleagris). Asian J Androl 18, 889–894. https://doi.org/10.4103/1008-682X.188448
47. Gee, G.F., Bakst, M.R., Sexton, T.J., 1985. Cryogenic Preservation of Semen from the Greater Sandhill Crane. J Wildl Manage 49, 480. https://doi.org/10.2307/3801557
48. Gee, G.F., Bertschinger, H., Donoghue, A.M., Blanco, J., Soley, J., n.d. Reproduction in Nondomestic Birds: Physiology, Semen Collection, Artifcial Insemination and Cryopreservation.
49. Gee, G.F., Sexton, T.J., 1990. Cryogenic preservation of semen from the Aleutian Canada goose ( Branta canadensis leucopareia ). Zoo Biol 9, 361–371. https://doi.org/10.1002/zoo.1430090504
50. George F. Gee, C. A. Morrell, J. C. Franson, O. H. Pattee, 1993. Cryopreservation of American Kestrel Semen with Dimethylsulfoxide 21–25.
51. Girndt, A., Cockburn, G., Sánchez-Tójar, A., Løvlie, H., Schroeder, J., 2017. Method matters: Experimental evidence for shorter avian sperm in faecal compared to abdominal massage samples. PLoS One 12, e0182853. https://doi.org/10.1371/journal.pone.0182853
52. Gloria, A., Contri, A., Carluccio, A., Parrillo, S., Cicconi, M., Robbe, D., 2014. The breeding management affects fresh and cryopreserved semen characteristics in Melopsittacus undulatus. Anim Reprod Sci 144, 48–53. https://doi.org/10.1016/j.anireprosci.2013.11.009
53. Góes PAA Cavalcante AK da S Nichi M Perez EG de A Barnabe RC Barnabe VH, 1999. Reproductive Characteristics of Captive Greater Rhea (Rhea americana) Males Reared in the State of São Paulo, Brazil.
54. Grier, J.W., 2024. Techniques and Results of Artificial Insemination with Golden Eagles, Journal of Raptor Research Journal of Raptor Research Recommended Citation Recommended Citation Grier, James W.
55. GVARYAHU, G., ROBINZON, B., MELTZER, A., PEREK, M., SNAPIR, N., 1984. An Improved Method for Obtaining Semen from Muscovy Drakes and Some of Its Quantitative and Qualitative Characteristics. Poult Sci 63, 548–553. https://doi.org/10.3382/ps.0630548
56. Gvaryahu, G., Robinzon, B., Meltzer, A., Snapir, N., n.d. Semen characteristics of the muscovy drake (Cairina moschata) as affected by seasonal variation.
57. Han, X.F., Niu, Z.Y., Liu, F.Z., Yang, C.S., 2005. Effects of Diluents, Cryoprotectants, Equilibration Time and Thawing Temperature on Cryopreservation of Duck Semen. Int J Poult Sci 4, 197–201.
58. Hartley, P.S., Dawson, B., Lindsay, C., McCormick, P., Wishart, G., 1999. Cryopreservation of houbara semen: A pilot study. Zoo Biol 18, 147–152. https://doi.org/10.1002/(SICI)1098-2361(1999)18:2<147::AID-ZOO6>3.0.CO;2-7
59. Hazim Jabbar Al-Daraji, 2011. Effect of collection method on semen quality of ostrich (Struthio camelus).
60. Hemberger, M., Hospes, R., Bostedt, H., 2001. Semen Collection, Examination and Spermiogram in Ostriches. Reproduction in Domestic Animals 36, 241–243. https://doi.org/10.1046/j.1439-0531.2001.00305.x
61. Herrera, J.A., Calderón, G., Guzmán, A., Vargas, A.K., Ávalos, A., Rosales, A.M., 2017. Evaluation of two diluents for the storage of fresh and cryopreserved semen of Harris hawk (Parabuteo unicinctus), Austral J Vet Sci.
62. Herrera, J.A., Quintana, J.A., López, M.A., Betancourt, M., Fierro, R., 2005a. INDIVIDUAL CRYOPRESERVATION WITH DIMETHYL SULFOXIDE AND POLYVINYLPYRROLIDONE OF EJACULATES AND POOLED SEMEN OF THREE AVIAN SPECIES. Arch Androl 51, 353–360. https://doi.org/10.1080/014850190944401
63. Herrera, J.A., Quintana, J.A., López, M.A., Betancourt, M., Fierro, R., 2005b. INDIVIDUAL CRYOPRESERVATION WITH DIMETHYL SULFOXIDE AND POLYVINYLPYRROLIDONE OF EJACULATES AND POOLED SEMEN OF THREE AVIAN SPECIES. Arch Androl 51, 353–360. https://doi.org/10.1080/014850190944401
64. Herrera-Barragán, J.A., Landa-García, S.S., Pérez-Rivero, J.J., Huitrón-Rodríguez, J.M., León-Galván, M.Á., Guzmán-Sánchez, A., Reyes-Mendoza, C.S., 2021. Obtaining Ejaculates through Operant Conditioning of the Golden Eagle (Aquila chrysaetos). Indian J Anim Res. https://doi.org/10.18805/IJAR.B-1342
65. Herrera-Barragán, J.A., Rodríguez-Montiel, I., Rosales-Torres, A.M., Ávalos-Rodríguez, A., Guzmán-Sánchez, A., Pérez-Rivero, J.J., 2024. Characterization and seminal cryopreservation of three species of birds of prey. Iran J Vet Res 25, 69–73. https://doi.org/10.22099/IJVR.2024.47943.6962
66. Hoolihan, J., Burnham, W., 2024. Peregrine Falcon Semen: A Quantitative and Qualitative Examination, Journal of Raptor Research.
67. Hu, X., Li, Jie, Xin, S., Ouyang, Q., Li, Jialu, Zhu, L., Hu, J., He, H., Liu, H., Li, L., Hu, S., Wang, J., 2024. Genome sequencing of drake semen micobiome with correlation with their compositions, sources and potential mechanisms affecting semen quality. Poult Sci 103, 103533. https://doi.org/10.1016/j.psj.2024.103533
68. Humann-Guilleminot, S., Blévin, P., Azou-Barré, A., Yacoumas, A., Gabrielsen, G.W., Chastel, O., Helfenstein, F., 2018. Sperm collection in Black-legged Kittiwakes and characterization of sperm velocity and morphology. Avian Res 9. https://doi.org/10.1186/s40657-018-0117-6
69. Jalme, M.S., Gaucher, P., Paillat, P., 1994. Artificial insemination in Houbara bustards (Chlamydotis undulata): influence of the number of spermatozoa and insemination frequency on fertility and ability to hatch. Reproduction 100, 93–103. https://doi.org/10.1530/jrf.0.1000093
70. Jerysz, A., Lukaszewicz, E., 2013. Effect of dietary selenium and vitamin e on ganders’ response to semen collection and ejaculate characteristics. Biol Trace Elem Res 153, 196–204. https://doi.org/10.1007/s12011-013-9652-5
71. Juan Manuel Blanco, George F. Gee, David E. Wildt, Ann M Donoghue, 2002. PRODUCING PROGENY FROM ENDANGERED BIRDS OF PREY: TREATMENT OF URINE-CONTAMINATED SEMEN AND ANOVEL INTRAMAGNAL INSEMINATION APPROACH. Zoo Willd Med .
72. Justine K. O’Brien, Hendrik H. Nollens, Todd L. Schmitt, Karen J. Steinman, Jean M. Dubach, Todd R. Robeck, 2017. MALE REPRODUCTIVE PHYSIOLOGY AND THE DEVELOPMENT OF ARTIFICIAL INSEMINATION IN THE MAGELLANIC PENGUIN (SPHENISCUS MAGELLANICUS) USING CH
73. K. Mossa, R., 2006. CHARACTERIZATION OF IRAQI LOCAL DRAKE EJACULATE AND THE EFFECT OF FREQUENCY OF COLLECTION IN SPERM QUALITY. Basrah Journal of Veterinary Research 5, 146–152. https://doi.org/10.33762/bvetr.2006.59047
74. KAMAR, G.A.R., 1962. SEMEN CHARACTERISTICS OF VARIOUS BREEDS OF DRAKES IN THE SUBTROPICS. Reproduction 3, 405–409. https://doi.org/10.1530/jrf.0.0030405
75. Kasai, K., Izumo, A., Inaba, T., Sawada, T., 2001. Efficiency of Artificial Vagina Method in Semen Collection from Osaka Drakes. Journal of Applied Poultry Research 10, 206–210. https://doi.org/10.1093/japr/10.3.206
76. Kast, T.L., Ketterson, E.D., Nolan, , Val, 1998. Variation in Ejaculate Quality in Dark-Eyed Juncos According to Season, Stage of Reproduction, and Testosterone Treatment. Auk 115, 684–693. https://doi.org/10.2307/4089416
77. Klimowicz, M., Łukaszewicz, E., Dubiel, A., 2005. Effect of collection frequency on quantitative and qualitative characteristics of pigeon ( Columba livia ) semen. Br Poult Sci 46, 361–365. https://doi.org/10.1080/00071660500098210
78. Kongbuntad, W., Kaewmad, P., Tanomtong, A., 2013. Semen quality and artificial insemination of eastern sarus crane Grus antigone shapii linn. In captive condition in the Nakhon Ratchasima zoo, Thailand. World Appl Sci J 28, 145–152. https://doi.org/10.5829/idosi.wasj.2013.28.01.76150
79. Kowalczyk, A., Klećkowska‐Nawrot, J., Łukaszewicz, E., 2017. Effect of selenium and vitamin E addition to the extender on liquid stored capercaillie ( Tetrao urogallus ) semen quality. Reproduction in Domestic Animals 52, 603–609. https://doi.org/10.1111/rda.12955
80. Kowalczyk, A., Łukaszewicz, E., 2015. Simple and effective methods of freezing capercaillie (Tetrao urogallus L.) semen. PLoS One 10. https://doi.org/10.1371/journal.pone.0116797
81. Kowalczyk, A., Łukaszewicz, E., 2012. The possibility of obtaining intergeneric hybrids via White Kołuda (Anser anser L.) goose insemination with fresh and frozen-thawed Canada goose (Branta canadensis L.) gander semen. Theriogenology 77, 507–513. https://doi.org/10.1016/j.theriogenology.2011.08.025
82. Kowalczyk, A., Łukaszewicz, E., Rzońca, Z., 2012a. Successful preservation of capercaillie (Tetrao urogallus L.) semen in liquid and frozen states. Theriogenology 77, 899–907. https://doi.org/10.1016/j.theriogenology.2011.09.015
83. Kowalczyk, A., Łukaszewicz, E., Rzońca, Z., 2012b. Successful preservation of capercaillie (Tetrao urogallus L.) semen in liquid and frozen states. Theriogenology 77, 899–907. https://doi.org/10.1016/j.theriogenology.2011.09.015
84. Kowalczyk, A., Łukaszewicz, E., Strzała, T., Partyka, A., Rosenberger, J., 2020. Characteristics of capercaillie ( Tetrao urogallus ) semen analysed with flow cytometry combined with fertility results. Reproduction in Domestic Animals 55, 984–991. https://doi.org/10.1111/rda.13740
85. Laskemoen, T., Kleven, O., Fossøy, F., Robertson, R.J., Rudolfsen, G., Lifjeld, J.T., 2010. Sperm quantity and quality effects on fertilization success in a highly promiscuous passerine, the tree swallow Tachycineta bicolor. Behav Ecol Sociobiol 64, 1473–1483. https://doi.org/10.1007/s00265-010-0962-8
86. Lee, H., Kim, H.-N., Go, J.-S., Cha, M.-C., Yun, S., Jin, S.-J., Lee, J.-W., Yoo, J.-C., 2023. A novel method to collect sperm from brood parasitic cuckoos: Urodeum stimulation (UroS) method. Avian Res 14, 100085. https://doi.org/10.1016/j.avrs.2023.100085
87. Lierz, M., Reinschmidt, M., Müller, H., Wink, M., Neumann, D., 2013. A novel method for semen collection and artificial insemination in large parrots (Psittaciformes). Sci Rep 3, 2066. https://doi.org/10.1038/srep02066
88. Lindsay, C., Staines, H.J., McCormick, P., McCallum, C., Choulani, F., Wishart, G.J., 1999. Variability in the size of the nucleus in spermatozoa from Houbara bustards, Chlamydotis undulata undulata. Reproduction 117, 307–313. https://doi.org/10.1530/jrf.0.1170307
89. Liu, S.J., Zheng, J.X., Yang, N., 2008. Semen Quality Factor as an Indicator of Fertilizing Ability for Geese. Poult Sci 87, 155–159. https://doi.org/10.3382/ps.2007-00300
90. Łukaszewicz, E., 2006. CHARACTERISTICS OF FRESH GANDER SEMEN AND ITS SUSCEPTIBILITY TO CRYOPRESERVATION IN SIX GENERATIONS DERIVED FROM GEESE INSEMINATED WITH FROZEN-THAWED SEMEN, CryoLetters.
91. Lukaszewicz, E., 2002. An effective method for freezing White Italian gander semen. Theriogenology 58, 19–27. https://doi.org/10.1016/S0093-691X(01)00690-2
92. Lukaszewicz, E., 2001. DMF effects on frozen gander semen. Br Poult Sci 42, 308–314. https://doi.org/10.1080/00071660120055250
93. Łukaszewicz, E., 2001. Effects of semen filtration and dilution rate on morphology and fertility of frozen gander spermatozoa. Theriogenology 55, 1819–1829. https://doi.org/10.1016/S0093-691X(01)00524-6
94. Łukaszewicz, E., Chrzanowska, M., Jerysz, A., Chełmońska, B., 2004. Attempts on freezing the Greylag (Anser anser L.) gander semen. Anim Reprod Sci 80, 163–173. https://doi.org/10.1016/S0378-4320(03)00119-2
95. Łukaszewicz, E., Jerysz, A., Chełmońska, B., 2020a. Effect of semen extenders and storage time on quality of Muscovy duck ( Cairina moschata ) drake semen during the entire reproductive season. Reproduction in Domestic Animals 55, 943–950. https://doi.org/10.1111/rda.13731
96. Łukaszewicz, E., Jerysz, A., Kowalczyk, A., 2020b. Reproductive season and male effect on quantitative and qualitative traits of individually collected Muscovy duck ( Cairina moschata ) semen. Reproduction in Domestic Animals 55, 1735–1746. https://doi.org/10.1111/rda.13833
97. Łukaszewicz, E., Kowalczyk, A., 2015. The Usefulness of Captive Kept Capercaillie ( <scp>T</scp> etrao urogallus L.) as the Semen Donors for Artificial Insemination and Gene Pool Preservation In vitro. Reproduction in Domestic Animals 50, 452–457. https://doi.org/10.1111/rda.12512
98. Łukaszewicz, E., Kowalczyk, A., Jerysz, A., 2021. Characteristics of semen collected from gander included in the genetic resources conservation program. Poult Sci 100, 101314. https://doi.org/10.1016/j.psj.2021.101314
99. Łukaszewicz, E., Kowalczyk, A., Jerysz, A., Lisowski, M., 2024. Freezability of Semen Collected from Ganders of 12 Breeds Covered by the Polish Genetic Resources Conservation Program. Annals of Animal Science 24, 1171–1178. https://doi.org/10.2478/aoas-2024-0025
100. Łukaszewicz, E., Kowalczyk, A., Rzońca, Z., 2011. Characteristics of fresh semen of captive‐bred capercaillie Tetrao urogallus L. Zoo Biol 30, 672–680. https://doi.org/10.1002/zoo.20367
101. Lukaszewicz, E., Kowalczyk, A., Rzonca, Z., 2011. Successful semen collection from Capercaillie (Tetrao urogallus L.) kept in an aviary system. Ornis Fenn 88. https://doi.org/10.51812/of.133769
102. Lukaszewicz E, Kruszynski W, Fujihara N, 2003. Effect of age on quality of fresh and frozen-thawed semen in White Italian ganders. Asian J Androl.
103. M. Kelly Brock, 1991. Semen Collection and Artificial Insemination in the Hispaniolan Parrot (Amazona ventralis). Journal of Zoo and Wildlife Medicine 22.
104. M. Kelly Brock, David M. Bird, 1991. Prefreeze and Postthaw Effects of Glycerol and Dimethylacetamide on Motility and Fertilizing Ability of American Kestrel (Falco sparverius) Spermatozoa. Journal of Zoo and Wildlife Medicine 22.
105. Madeddu, M., Berlinguer, F., Ledda, M., Leoni, G.G., Satta, V., Succu, S., Rotta, A., Pasciu, V., Zinellu, A., Muzzeddu, M., Carru, C., Naitana, S., 2009. Ejaculate collection efficiency and post-thaw semen quality in wild-caught Griffon vultures from the Sardinian population. Reprod Biol Endocrinol 7, 18. https://doi.org/10.1186/1477-7827-7-18
106. Madeddu, M., Berlinguer, F., Pasciu, V., Succu, S., Satta, V., Leoni, G.G., Zinellu, A., Muzzeddu, M., Carru, C., Naitana, S., 2010. Differences in semen freezability and intracellular ATP content between the rooster (Gallus gallus domesticus) and the Barbary partridge (Alectoris barbara). Theriogenology 74, 1010–1018. https://doi.org/10.1016/j.theriogenology.2010.05.001
107. Madhi, D.N., Hatif, S.A., 2022. Comparative study of semen physical characteristics and DNA sperm integrity in different breeds of falcon in Iraq. Int J Health Sci (Qassim) 7440–7449. https://doi.org/10.53730/ijhs.v6nS4.10179
108. Mafunda, P.S., Maree, L., Kotze, A., van der Horst, G., 2017a. Sperm structure and sperm motility of the African and Rockhopper penguins with special reference to multiple axonemes of the flagellum. Theriogenology 99, 1–9. https://doi.org/10.1016/j.theriogenology.2017.05.009
109. Malecki, I., Martin, G., Lindsay, D., 1997. Semen production by the emu (Dromaius novaehollandiae). 2. Effect of collection frequency on the production of semen and spermatozoa. Poult Sci 76, 622–626. https://doi.org/10.1093/ps/76.4.622
110. Mantovani, C., Cerolini, S., Bellagamba, F., Mangiagalli, M., Cavalchini, L., 1993. Evaluation of pheasant semen production during the reproductive season. Reprod Nutr Dev 33, 503–509. https://doi.org/10.1051/rnd:19930602
111. Mantovani, C., Cerolini, S., Bellagamba, F., Mangiagalli, M.G., Cavalchini, L.G., n.d. Evaluation of pheasant semen production during the reproductive season.
112. Marti-Colombas, M., Sánchez-Calabuig, M.J., Castaño, C., Toledano-Díaz, A., Martínez-Nevado, E., López-Goya, A., Santiago-Moreno, J., 2022. Optimization of semen cryopreservation in black-footed (Spheniscus demersus) and gentoo (Pygoscelis papua) penguins using dimethylacetamide and dimethylsulfoxide. Anim Reprod Sci 237, 106933. https://doi.org/10.1016/j.anireprosci.2022.106933
113. Millán de la Blanca, M.G., Martínez-Nevado, E., Castaño, C., García, J., Bernal, B., Toledano-Díaz, A., Esteso, M.C., Bóveda, P., Martínez-Fresneda, L., López-Sebastián, A., Santiago-Moreno, J., 2021. Sperm Cryopreservation in American Flamingo (Phoenicopterus Ruber): Influence of Cryoprotectants and Seminal Plasma Removal. Animals 11, 203. https://doi.org/10.3390/ani11010203
114. MØLLER, A.P., 1988. Testes size, ejaculate quality and sperm competition in birds. Biological Journal of the Linnean Society 33, 273–283. https://doi.org/10.1111/j.1095-8312.1988.tb00812.x
115. Mumtaz, S., Razzaq, A., Ahmad, T., Iqbal, M., Khanum, L., Allah Rakha, B., Pervaiz, R., 2022. Evaluation of Extenders for the Liquid Storage of Ring-Necked Pheasant (Phasianuscolchicus) Semen. Int J Curr Res Rev 14, 17–24. https://doi.org/10.31782/ijcrr.2022.141504
116. Muvhali, P.T., Bonato, M., Malecki, I.A., Cloete, S.W.P., 2022. Mass Sperm Motility Is Correlated to Sperm Motility as Measured by Computer-Aided Sperm Analysis (CASA) Technology in Farmed Ostriches. Animals 12, 1104. https://doi.org/10.3390/ani12091104
117. Muvhali, P.T., Bonato, M., Malecki, I.A., du Plessis, L., Soley, J.T., Cloete, S.W.P., 2020. Ostrich ejaculate characteristics and male libido around equinox and solstice dates. Trop Anim Health Prod 52, 2609–2619. https://doi.org/10.1007/s11250-020-02299-2
118. Neumann, D., Kaleta, E.F., Lierz, M., 2013. Semen collection and artificial insemination in cockatiels (Nymphicus hollandicus) – A potential model for psittacines. Tierärztliche Praxis Ausgabe K: Kleintiere / Heimtiere 41, 101–105. https://doi.org/10.1055/s-0038-1623695
119. Nwakalor, L.N., Okeke, G.C., Njoku, D.C., 1988. Semen characteristics of the guinea fowl Numida meleagris meleagris. Theriogenology 29, 545–554. https://doi.org/10.1016/S0093-691X(88)80003-7
120. O’Brien, E., Castaño, C., Toledano‐Díaz, A., Caamaño, J.N., Hidalgo, C., Fidalgo, L.E., López‐Beceiro, A.M., Esteso, M.C., Balsera, R., García‐Casado, P., Łukaszewicz, E., Santiago‐Moreno, J., 2022. Use of native chicken breeds ( Gallus gallus domesticus ) for the development of suitable methods of Cantabrian capercaillie ( Tetrao urogallus cantabricus ) semen cryopreservation. Vet Med Sci 8…
121. O’brien, J.K., Oehler, D.A., Malowski, S.P., Roth, T.L., 1999. Semen Collection, Characterization, and Cryopreservation in a Magellanic Penguin (Spheniscus magellanicus). Zoo Biol 18, 199–214. https://doi.org/10.1002/(SICI)1098-2361(1999)18:3<199::AID-ZOO4>3.0.CO;2
122. O’Brien, J.K., Robeck, T.R., 2014. Semen characterization, seasonality of production, and in vitro sperm quality after chilled storage and cryopreservation in the king penguin ( Aptenodytes patagonicus ). Zoo Biol 33, 99–109. https://doi.org/10.1002/zoo.21111
123. O’Brien, J.K., Steinman, K.J., Montano, G.A., Dubach, J.M., Robeck, T.R., 2016. Chicks produced in the Magellanic penguin ( Spheniscus magellanicus ) after cloacal insemination of frozen‐thawed semen. Zoo Biol 35, 326–338. https://doi.org/10.1002/zoo.21304
124. Oliveira, A., Martínez, F., Gil, L., Luño, V., 2021. Morphological Characteristics of the Sperm of the Peregrine Falcon (Falco peregrinus) during the Reproductive Season. Vet Sci 8, 169. https://doi.org/10.3390/vetsci8090169
125. Özkök, A.O., 2024. Effect of Different Processing Temperature on Motility and Viability in Canary Sperm. Indian J Anim Res. https://doi.org/10.18805/IJAR.BF-1767
126. Özkök, A.O., Kilinç, G., 2023. Germinated Wheat as a Potential Natural Source of Antioxidants to Improve Sperm Quality: A Canary Trial. Vet Sci 11, 4. https://doi.org/10.3390/vetsci11010004
127. Panyaboriban, S., Pukazhenthi, B., Brown, M.E., Crowe, C., Lynch, W., Singh, R.P., Techakumphu, M., Songsasen, N., 2016. Influence of cooling and thawing conditions and cryoprotectant concentration on frozen-thawed survival of white-naped crane (Antigone vipio) spermatozoa. Cryobiology 73, 209–215. https://doi.org/10.1016/j.cryobiol.2016.07.009
128. Paranzini, C.S., Correia, L.E.C. dos S., de Camargo, L.S., Silva, K.M., de França, T.M., Silva, J.A. de V., Veiga, N., de Souza, F.F., 2018. Feasibility of semen collection in red-winged tinamou (Rhynchotus rufescens) by manual stimulation and sazonality implications. Theriogenology 107, 36–40. https://doi.org/10.1016/j.theriogenology.2017.10.032
129. Parks, J.E., Heck, W.R., Hardaswick, V., Parks, J.E.;, Heck, W.R.;, 1986. Cryopreservation of Peregrine Falcon Semen and Post-thaw Dialysis to Remove Glycerol, Journal of Raptor Research.
130. Partyka, A., Łukaszewicz, E., Niżański, W., 2011. Flow cytometric assessment of fresh and frozen-thawed Canada goose (Branta canadensis) semen. Theriogenology 76, 843–850. https://doi.org/10.1016/j.theriogenology.2011.04.016
131. Penfold, L., Harnal, V., Lynch, W., Bird, D., Derrickson, S., Wildt, D., 2001. Characterization of northern pintail (Anas acuta) ejaculate and the effect of sperm preservation on fertility. Reproduction 121, 267–275. https://doi.org/10.1530/rep.0.1210267
132. Penfold, L.M., Wildt, D.E., Herzog, T.L., Lynch, W., Ware, L., Derrickson, S.E., Monfort, S.L., 2001. Seasonal patterns of LH, testosterone and semen quality in the Northern pintail duck ( Anas acuta ). Reprod Fertil Dev 12, 229–235. https://doi.org/10.1071/RD00093
133. Piaček, V., Zukal, J., Seidlová, V., Heger, T., Němcová, M., Přibyl, M., Vitula, F., Pikula, J., 2020. Fresh semen characteristics in captive accipitrid and falconid birds of prey. Acta Veterinaria Brno 89, 291–300. https://doi.org/10.2754/avb202089030291
134. Koji KASAI, Akihisa IZUMO, Toshio INABA and Tsutomu SAWADA., 2001. Evaluation of Fertilizing Ability of Spermatozoa from Individual Drake via In Vitro Sperm-egg Interaction Assay, Animal Science Journal.
135. Rowe, M., Czirják, G.Á., Lifjeld, J.T., Giraudeau, M., 2013. Lysozyme-associated bactericidal activity in the ejaculate of a wild passerine. Biological Journal of the Linnean Society 109, 92–100. https://doi.org/10.1111/bij.12044
136. Rowe, M., Swaddle, J.P., Pruett-Jones, S., Webster, M.S., 2010. Plumage coloration, ejaculate quality and reproductive phenotype in the red-backed fairy-wren. Anim Behav 79, 1239–1246. https://doi.org/10.1016/j.anbehav.2010.02.020
137. Rozenboim, I., Navot, A., Snapir, N., Rosenstrauch, A., el Halawani, M.E., Gvaryahu, G., Degen, A., 2003. Method for collecting semen from the ostrich ( Struthio camelus ) and some of its quantitative and qualitative characteristics. Br Poult Sci 44, 607–611. https://doi.org/10.1080/00071660310001618361
138. Rybnik, P.K., Horbańczuk, J.O., Łukaszewicz, E., Malecki, I.A., 2012. The ostrich ( Struthio camelus ) ejaculate – effects of the method of collection, male age, month of the season, and daily frequency. Br Poult Sci 53, 134–140. https://doi.org/10.1080/00071668.2011.643223
139. Rybnik, P.K., Horbanczuk, J.O., Naranowicz, H., Lukaszewicz, E., Malecki, I.A., 2007. Semen collection in the ostrich ( Struthio camelus ) using a dummy or a teaser female. Br Poult Sci 48, 635–643. https://doi.org/10.1080/00071660701573078
140. saint Jalme, M., Lecoq, R., Seigneurin, F., Blesbois, E., Plouzeau, E., 2003. Cryopreservation of semen from endangered pheasants: the first step towards a cryobank for endangered avian species. Theriogenology 59, 875–888. https://doi.org/10.1016/S0093-691X(02)01153-6
141. Samour, H.J., Spratt, D.M.J., Hutton, R.E., Jones, D.M., 1985. Studies on semen collection in waterfowl by electrical stimulation. British Veterinary Journal 141, 265–268. https://doi.org/10.1016/0007-1935(85)90062-4
142. SAMOUR, J.H., MARKHAM, J.A., MOORE, H.D.M., WATSON, P.F., 1988. Semen cryopreservation and artificial insemination in budgerigars ( Melopsittacus undulatus ). J Zool 216, 169–176. https://doi.org/10.1111/j.1469-7998.1988.tb02422.x
143. Santiago-Moreno, J., Castaño, C., Toledano-Díaz, A., Esteso, M.C., López-Sebastián, A., Gañán, N., Hierro, M.J., Marchal, F., Campo, J.L., Blesbois, E., 2015. Characterization of red-legged partridge (Alectoris rufa) sperm: Seasonal changes and influence of genetic purity. Poult Sci 94, 80–87. https://doi.org/10.3382/ps/peu020
144. Santiago-Moreno, J., Castaño, C., Toledano-Díaz, A., Esteso, M.C., López-Sebastián, A., Villaverde-Morcillo, S., Dávila, S.G., Gil, M.G., Blesbois, E., 2017. Successful chilling of red-legged partridge (Alectoris rufa) sperm for use in artificial insemination. Poult Sci 96, 4068–4074. https://doi.org/10.3382/ps/pex176
145. Santiago-Moreno, J., Castaño, C., Toledano-Díaz, A., Esteso, M.C., Martínez-Nevado, E., Gimeno-Martínez, J., López-Goya, A., 2019. Semen cryopreservation in black-footed (Spheniscus demersus) and gentoo (Pygoscelis papua) penguins: Effects of thawing temperature on semen characteristics. Anim Reprod Sci 200, 60–66. https://doi.org/10.1016/j.anireprosci.2018.11.011
146. Schneider, H., Fischer, D., Failing, K., Ehling, C., Meinecke-Tillmann, S., Wehrend, A., Lierz, M., 2018. Investigations on a cryopreservation protocol for long-term storage of psittacine spermatozoa using cockatiel semen as an example. Theriogenology 110, 8–17. https://doi.org/10.1016/j.theriogenology.2017.12.027
147. Schneider, H., Fischer, D., Mathews, S.R., Failing, K., Delehanty, D.J., Lierz, M., 2019. Semen collection, semen analysis and artificial insemination in Columbian sharp-tailed grouse (Tympanuchus phasianellus columbianus) as part of a species conservation project. Theriogenology 132, 128–137. https://doi.org/10.1016/j.theriogenology.2019.03.037
148. Seigneurin, F., Grasseau, I., Chapuis, H., Blesbois, E., 2013. An efficient method of guinea fowl sperm cryopreservation. Poult Sci 92, 2988–2996. https://doi.org/10.3382/ps.2013-03166
149. Setioko, A.R., Hetzel, D.J.S., 1984. The effect of collection method and housing system on semen production and fertility of Alabio drakes. Br Poult Sci 25, 167–172. https://doi.org/10.1080/00071668408454855
150. Smith, A.M.J., Bonato, M., Dzama, K., Malecki, I.A., Cloete, S.W.P., 2023. Liquid storage of Ostrich (Struthio camelus) semen at 5 °C through intermediate dilution. Anim Reprod Sci 249, 107148. https://doi.org/10.1016/j.anireprosci.2022.107148
151. Smith, A.M.J., Bonato, M., Dzama, K., Malecki, I.A., Cloete, S.W.P., 2018. Ostrich specific semen diluent and sperm motility characteristics during in vitro storage. Anim Reprod Sci 193, 107–116. https://doi.org/10.1016/j.anireprosci.2018.04.005
152. Smith, A.M.J., Bonato, M., Dzama, K., Malecki, I.A., Cloete, S.W.P., 2016. Classification of ostrich sperm characteristics. Anim Reprod Sci 168, 138–150. https://doi.org/10.1016/j.anireprosci.2016.03.007
153. Songsasen, N., Converse, S.J., Brown, M., 2019. Reproduction and Reproductive Strategies Relevant to Management of Whooping Cranes Ex Situ, in: Whooping Cranes: Biology and Conservation. Elsevier, pp. 373–387. https://doi.org/10.1016/B978-0-12-803555-9.00017-7
154. Sontakke, S.D., Umapathy, G., Sivaram, V., Kholkute, S.D., Shivaji, S., 2004. Semen characteristics, cryopreservation, and successful artificial insemination in the Blue rock pigeon (Columba livia). Theriogenology 62, 139–153. https://doi.org/10.1016/j.theriogenology.2003.08.018
155. Sood, S., Malecki, I.A., Tawang, A., Martin, G.B., 2012. Survival of emu (Dromaius novaehollandiae) sperm preserved at subzero temperatures and different cryoprotectant concentrations. Theriogenology 78, 1557–1569. https://doi.org/10.1016/j.theriogenology.2012.06.025
156. Sood, S., Malecki, I.A., Tawang, A., Martin, G.B., 2011. Response of spermatozoa from the emu (Dromaius novaehollandiae) to rapid cooling, hyperosmotic conditions and dimethylacetamide (DMA). Anim Reprod Sci 129, 89–95. https://doi.org/10.1016/j.anireprosci.2011.10.010
157. Sorci, G., Hussein, H.A., Levêque, G., saint Jalme, M., Lacroix, F., Hingrat, Y., Lesobre, L., 2023. Ranking parameters driving siring success during sperm competition in the North African houbara bustard. Commun Biol 6, 305. https://doi.org/10.1038/s42003-023-04698-1
158. STELLA CYRIAC, LEO JOSEPH, PEETHAMBARAN P A, NARAYANANKUTTY K, KARTHIAYINI K, 2013. Semen quality characteristics of White Pekin, Kuttanad (Anas platyrhynchos domesticus) and Muscovy (Cairina moschata momelanotus) drakes. Indian J Anim Sci 83.
159. Stunden, C., Bluhm, C., Cheng, K., Rajamahendran, R., 1998. Plasma testosterone profiles, semen characteristics, and artificial insemination in yearling and adult captive Mallard ducks (Anas platyrhynchos). Poult Sci 77, 882–887. https://doi.org/10.1093/ps/77.6.882
160. Tan, N.S., 1980. The frequency of collection and semen production in Muscovy ducks. Br Poult Sci 21, 265–272. https://doi.org/10.1080/00071668008416668
161. Taskin, A., Ergun, F., Karadavut, U., Ergun, D., 2022. Effect of Different Extenders on Sperm Motility and Vitality in Goose Semen Cryopreservation. Brazilian Journal of Poultry Science 24. https://doi.org/10.1590/1806-9061-2020-1429
162. Taşkın, A., Ergün, F., Karadavut, U., Ergün, D., 2020. Effects of Extenders and Cryoprotectants on Cryopreservation of Duck Semen. Turkish Journal of Agriculture - Food Science and Technology 8, 1965–1970. https://doi.org/10.24925/turjaf.v8i9.1965-1970.3588
163. Taskin, A., Ergun, D., Ergun, F., 2023. Effects of different concentrations of honeysuckle (Lonicera iberica M. Bieb.) and barberry (Berberis vulgaris L.) extracts in cryopreserving of duck semen on sperm quality. European Poultry Science 87, 1–12. h
164. Thai, J., Vet Med ; Sananmuang, T., 2020. Optimizing system for sperm quality evaluation using crystalloid diluent for pigeons (Columba livia domestica), / Thai J Vet Med. 2020.
165. Timothy Robert Birkhead, M. Petrie, 1995. Ejaculate features and sperm utilization in peafowl Pavo cristatus. Proc R Soc Lond B Biol Sci 261, 153–158. https://doi.org/10.1098/rspb.1995.0130
166. Umapathy, G., Sontakke, S., Reddy, A., Ahmed, S., Shivaji, S., 2005. Semen Characteristics of the Captive Indian White-Backed Vulture (Gyps bengalensis)1. Biol Reprod 73, 1039–1045. https://doi.org/10.1095/biolreprod.105.043430
167. Váradi, É., Drobnyák, Á., Végi, B., Liptói, K., Kiss, C., Barna, J., 2019. Cryopreservation of gander semen in cryovials – Comparative study. Acta Vet Hung 67, 246–255. https://doi.org/10.1556/004.2019.026
168. Váradi, É., Végi, B., Liptói, K., Barna, J., 2013. Methods for Cryopreservation of Guinea Fowl Sperm. PLoS One 8, e62759. https://doi.org/10.1371/journal.pone.0062759
169. Végi, B., Bíró, E., Grózner, D., Drobnyák, Á., Kreizinger, Z., Gyuranecz, M., Barna, J., 2021. Mycoplasma species in the male reproductive organs and the fresh and frozen semen of the Hungarian native goose. Avian Pathology 50, 458–464. https://doi.org/10.1080/03079457.2021.1978391
170. Villaverde-Morcillo, S., García-Sánchez, R., Castaño, C., Rodríguez, E., Gonzalez, F., Esteso, M., Santiago-Moreno, J., 2015. CHARACTERIZATION OF NATURAL EJACULATES AND SPERM CRYOPRESERVATION IN A GOLDEN EAGLE ( AQUILA CHRYSAETUS ). Journal of Zoo and Wildlife Medicine 46, 335–338. https://doi.org/10.1638/2013-0293R1.1
171. Villaverde-Morcillo, S., Soler, A.J., Esteso, M.C., Castaño, C., Miñano-Berna, A., Gonzalez, F., Santiago-Moreno, J., 2017. Immature and mature sperm morphometry in fresh and frozen-thawed falcon ejaculates. Theriogenology 98, 94–100. https://doi.org/10.1016/j.theriogenology.2017.04.051
172. Waldoch, J., Root, T., Dubach, J.M., Proudfoot, J., Ramer, J., 2012. Semen Characteristics and artificial insemination in rockhopper penguins ( Eudyptes chrysocome chrysocome ). Zoo Biol 31, 166–180. https://doi.org/10.1002/zoo.20390
173. Waldoch, J., Root, T., Ramer, J., Proudfoot, J., 2007. SEMEN COLLECTION AND CHARACTERIZATION IN ROCKHOPPER PENGUINS (EUDYPTES CHRYSOCOME CHRYSOCOME). Journal of Zoo and Wildlife Medicine 38, 13–17. https://doi.org/10.1638/05-107.1
174. Wannaratana, S., Olanratmanee, E., Charoenmuang, K., Boriharnthanawuth, T., Tangtrongwanich, B., Jongpattana, T., Sukhor, Y., Kongthip, A., Sananmuang, T., 2021. Seasonal effect on semen availability and quality of racing pigeon in Thailand. Vet World 1459–1464. https://doi.org/10.14202/vetworld.2021.1459-1464
175. Watanabe, M., n.d. An Improved Technique of the Artificial Insemination in Ducks.
176. Yang, Y., Zhang, Y., Ding, J., Ai, S., Guo, R., Bai, X., Yang, W., 2019. Optimal analysis conditions for sperm motility parameters with a CASA system in a passerine bird, Passer montanus. Avian Res 10, 35. https://doi.org/10.1186/s40657-019-0174-5
177. Zawadzka, J., Łukaszewicz, E., Kowalczyk, A., 2015. Comparative semen analysis of two Polish duck strains from a conservation programme. European Poultry Science 79, 1–9. https://doi.org/10.1399/eps.2015.106
178. Zhang, Y.Y., 2006. Semen Characterization and Sperm Storage in Cabot’s Tragopan. Poult Sci 85, 892–898. https://doi.org/10.1093/ps/85.5.892
